# Supplementary material for: Crystal structures, red-shifted luminescence and iodide-anion recognition properties of four novel D–A type Zn(ii) complexes
Source: Royal Society of Chemistry journal article supplement (doi:10.1039/c9dt04840e), 2020-01-01
Supplement: c9dt04840e1.pdf [file c9dt04840e1.pdf]

## Supplementary Information

### Crystal Structures, Red-shift Luminescent Properties And Iodide-anion

### Recognition Of Four novel D-A Type Zn(II) Complexes

Jian-Biao Song<sup>a</sup>, Pengfei Wang<sup>a</sup>, Li Yan<sup>b</sup>, Liang Hao<sup>a</sup>, Maroof Ahmad Khan<sup>a</sup>, Gui-lei Liu<sup>c</sup> and Hui Li<sup>\*a</sup>

<sup>a</sup> Key Laboratory of Clusters Science of Ministry of Education, School of Chemistry and Chemical Engineering, Beijing Institute of Technology, Beijing, 100081, P.R. China.

E-mail: [lihui@bit.edu.cn](mailto:lihui@bit.edu.cn); Fax: +86 10 68912667.

<sup>b</sup> Analysis and Testing Center, Beijing Institute of Technology, Beijing, 100081, P. R. China.

E-mail: [626828807@qq.com](mailto:626828807@qq.com).

<sup>c</sup> National Research Center for Geoanalysis, Beijing 100037, P. R. China.

Email: [liuguilei2008@163.com](mailto:liuguilei2008@163.com); Tel: 86-10-68999561.

## Content

|                                                                                                                                             |    |
|---------------------------------------------------------------------------------------------------------------------------------------------|----|
| 1. Infrared spectrum of complexes <b>1, 2, 3</b> and <b>4</b> .....                                                                         | 3  |
| 2. <sup>1</sup> H NMR spectrum of complexes <b>1, 2, 3</b> and <b>4</b> .....                                                               | 5  |
| 3. Single crystal structures and crystallographic data of complexes <b>1, 2, 3</b> and <b>4</b> .....                                       | 7  |
| 4. X-ray powder diffraction of complexes <b>1, 2, 3</b> and <b>4</b> .....                                                                  | 15 |
| 5. Thermal gravity analysis of complexes <b>1, 2, 3</b> and <b>4</b> .....                                                                  | 17 |
| 6. UV-Vis spectra of complexes <b>1, 2, 3</b> and <b>4</b> in different kinds of solutions.....                                             | 19 |
| 7. Fluorescence spectra, quantum yield and lifetime of complexes <b>1, 2, 3</b> and <b>4</b> .....                                          | 21 |
| 8. CIEE properties of complexes <b>1, 2, 3</b> and <b>4</b> .....                                                                           | 24 |
| 9. DFT and TD-DFT Computations of the ligands of complexes <b>1, 2, 3</b> and <b>4</b> .....                                                | 25 |
| 10. UV-vis titration of complexes <b>1, 2, 3</b> and <b>4</b> with F <sup>-</sup> , Cl <sup>-</sup> and Br <sup>-</sup> in THF.....         | 27 |
| 11. Fluorescence titration of complexes <b>1, 2, 3</b> and <b>4</b> with F <sup>-</sup> , Cl <sup>-</sup> and Br <sup>-</sup> in THF.....   | 33 |
| 12. Iodide recognition of complexes <b>1, 2, 3</b> and <b>4</b> in THF.....                                                                 | 39 |
| 13. Benesi-Hilderbrand and Job's plot curve of complexes <b>1, 2, 3</b> and <b>4</b> with I <sup>-</sup> monitored with UV-Vis spectra..... | 40 |

1. Infrared Radiation spectrum of complexes **1**, **2**, **3** and **4**

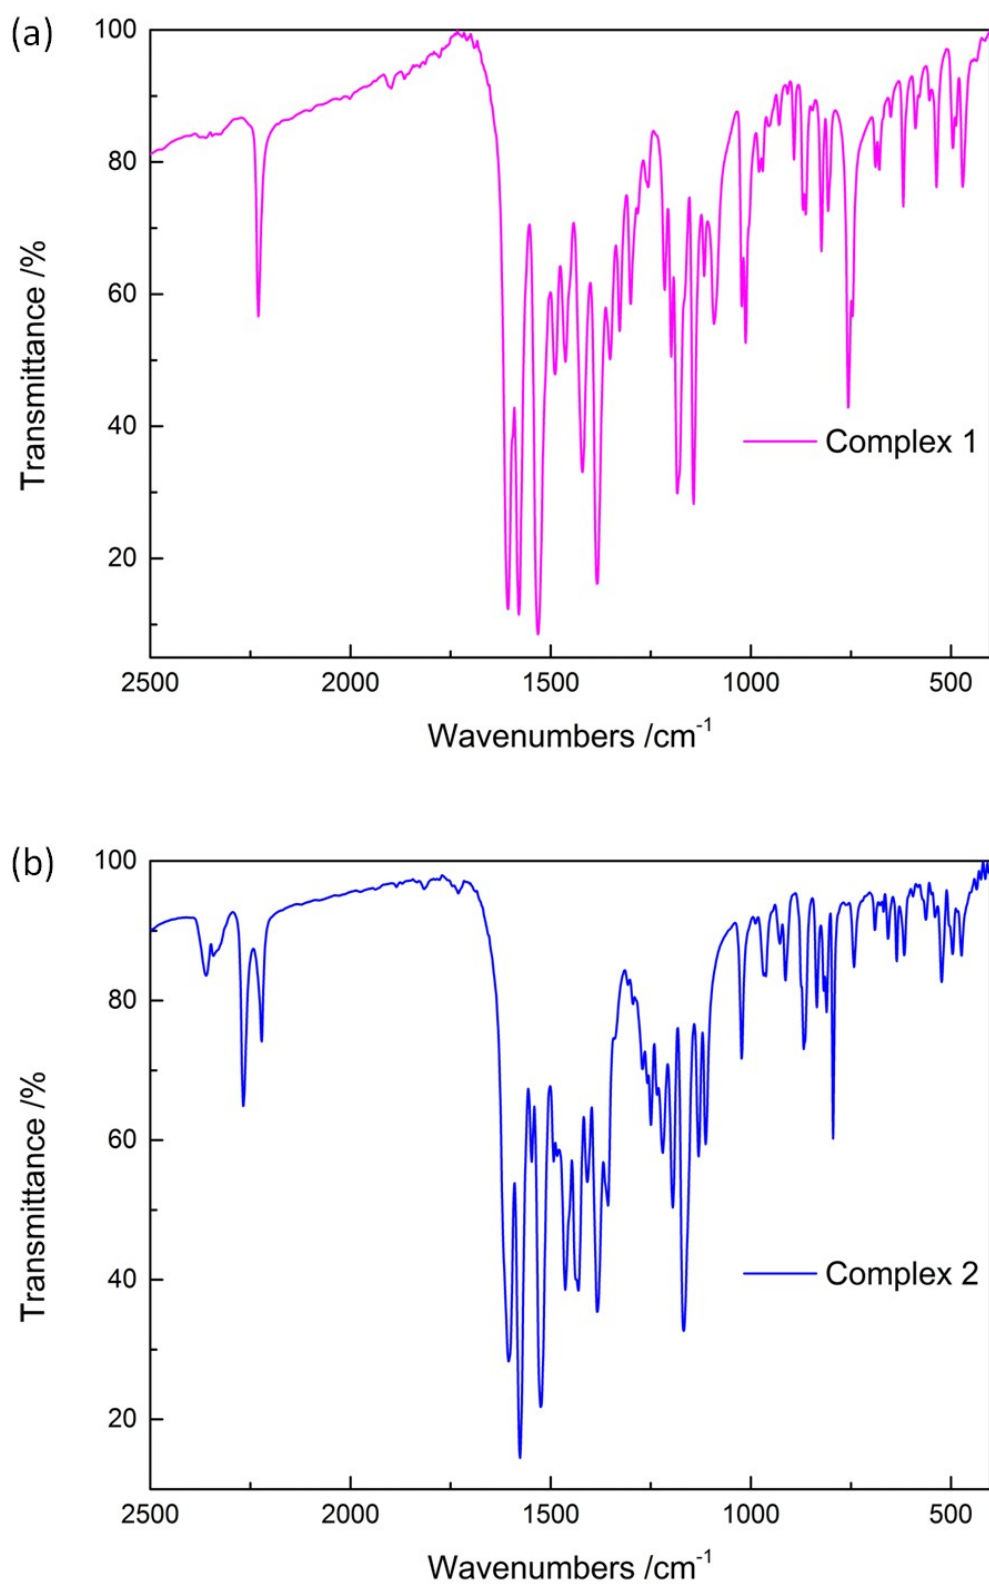

Fig. S1 IR spectrum of **1** (a) and **2** (b).

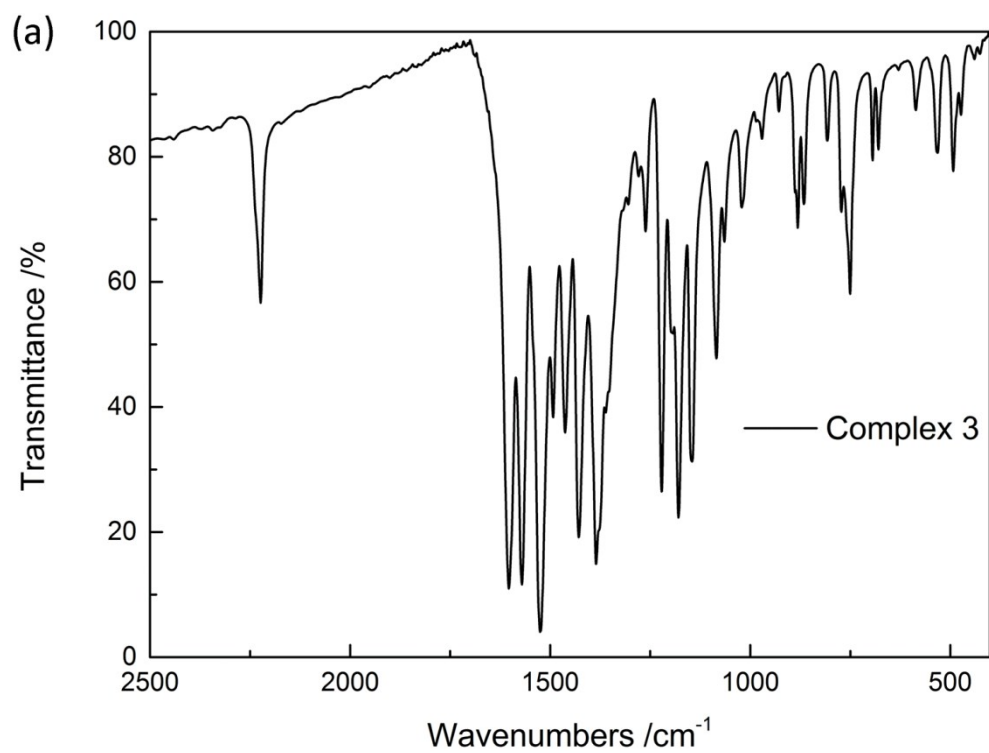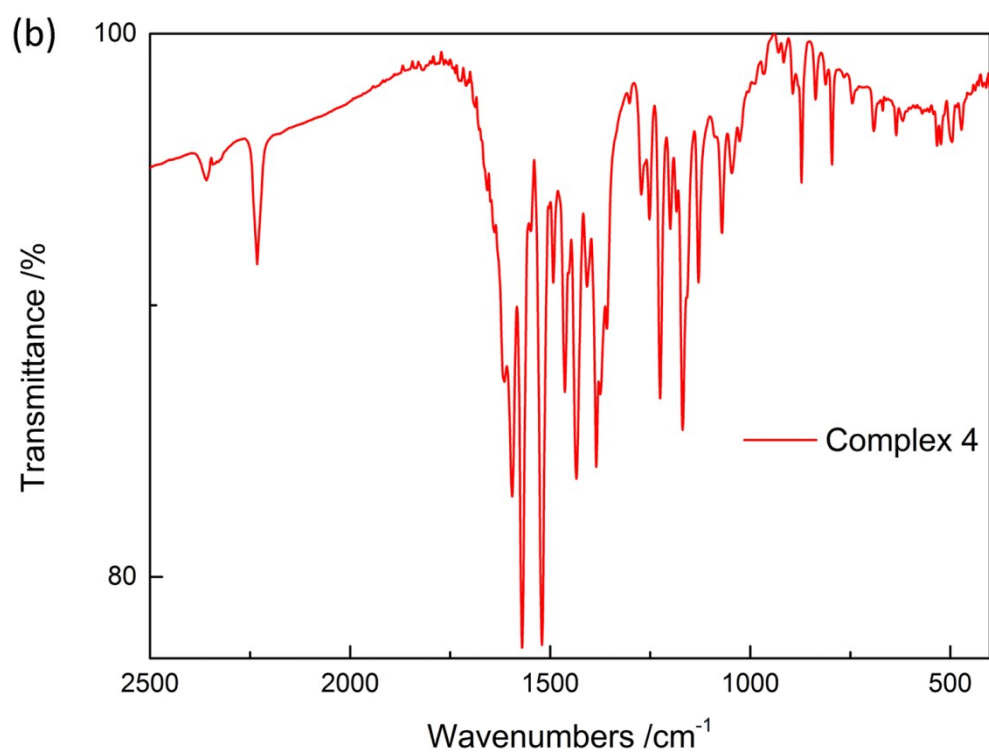

Fig. S2 IR spectrum of **3** (a) and **4** (b).

2.  $^1\text{H}$  NMR spectrum of complexes **1**, **2**, **3** and **4**

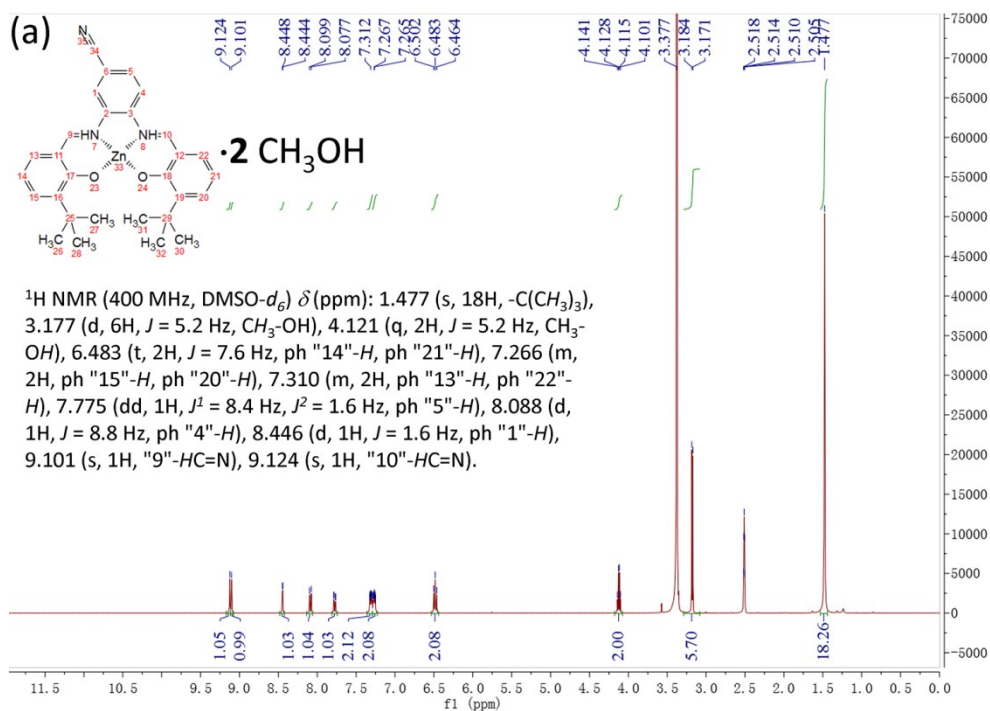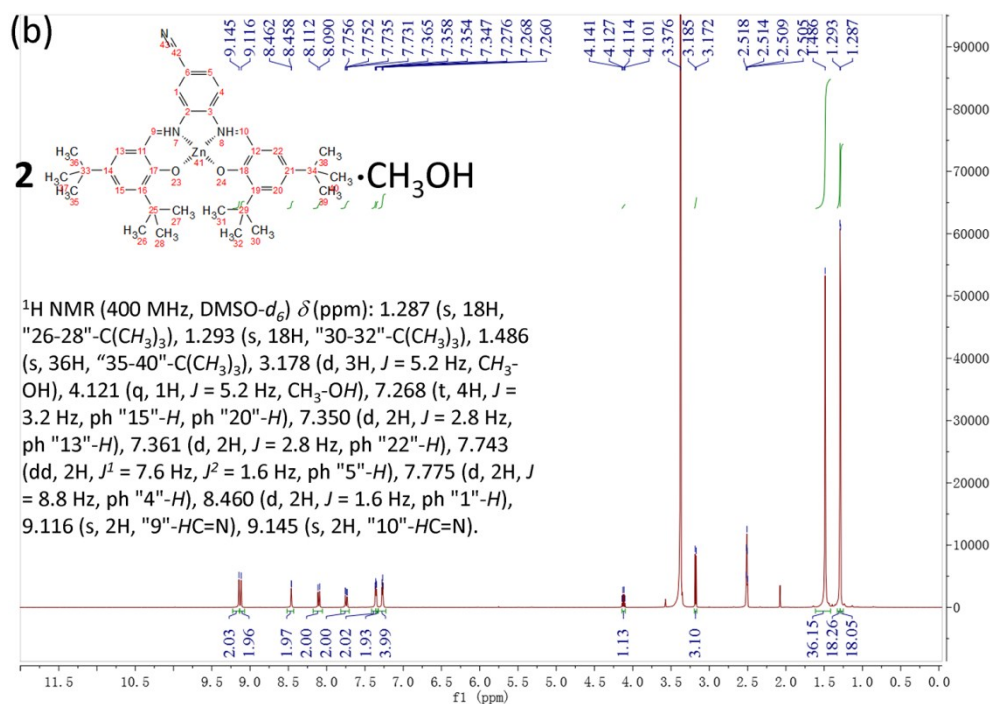

Fig. S3  $^1\text{H}$  NMR spectrum (400 MHz, 298K) of complexes **1** (a) and **2** (b) in  $\text{DMSO}-d_6$ .

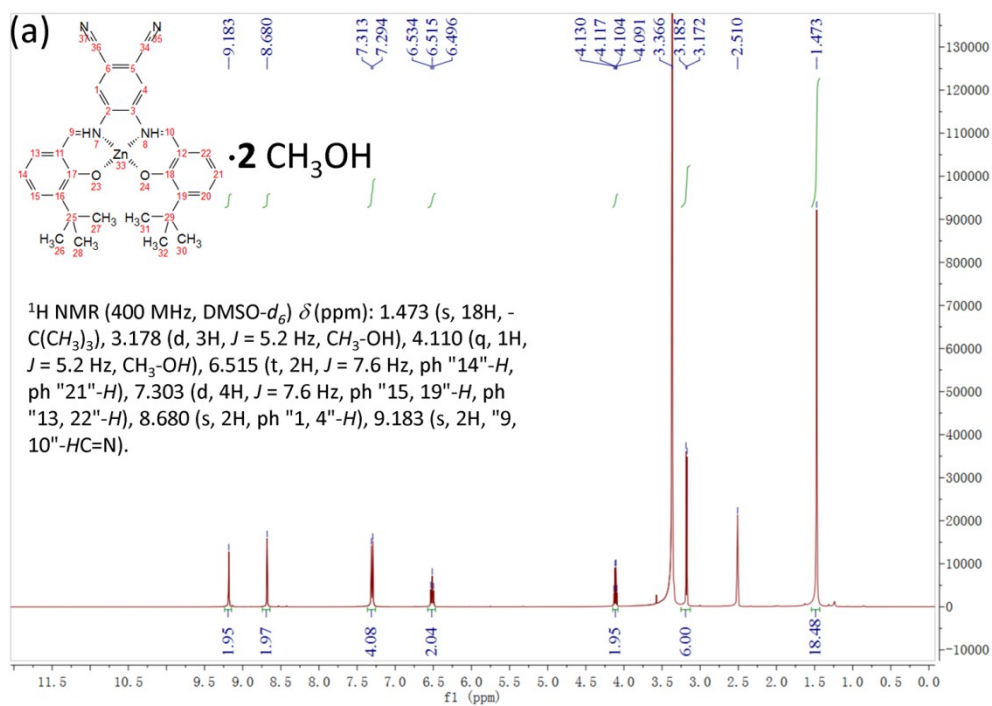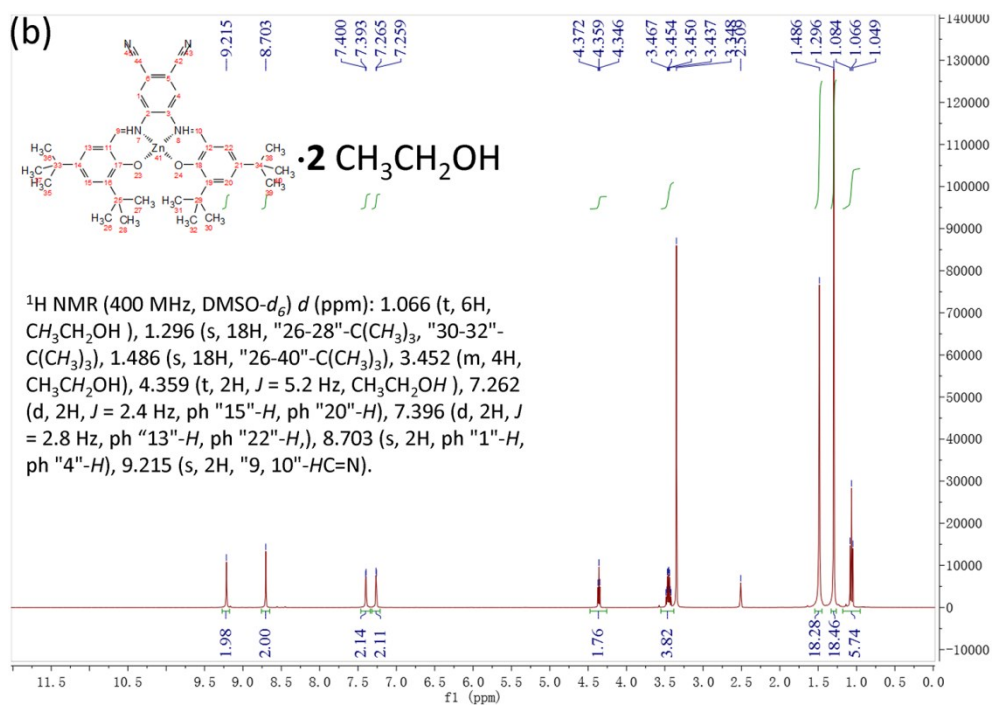

Fig. S4  $^1\text{H}$  NMR spectrum (400 MHz, 298K) of complexes 3 (a) and 4 (b) in  $\text{DMSO}-d_6$ .

3. Single crystal structures and crystallographic data of complexes 1, 2, 3 and 4

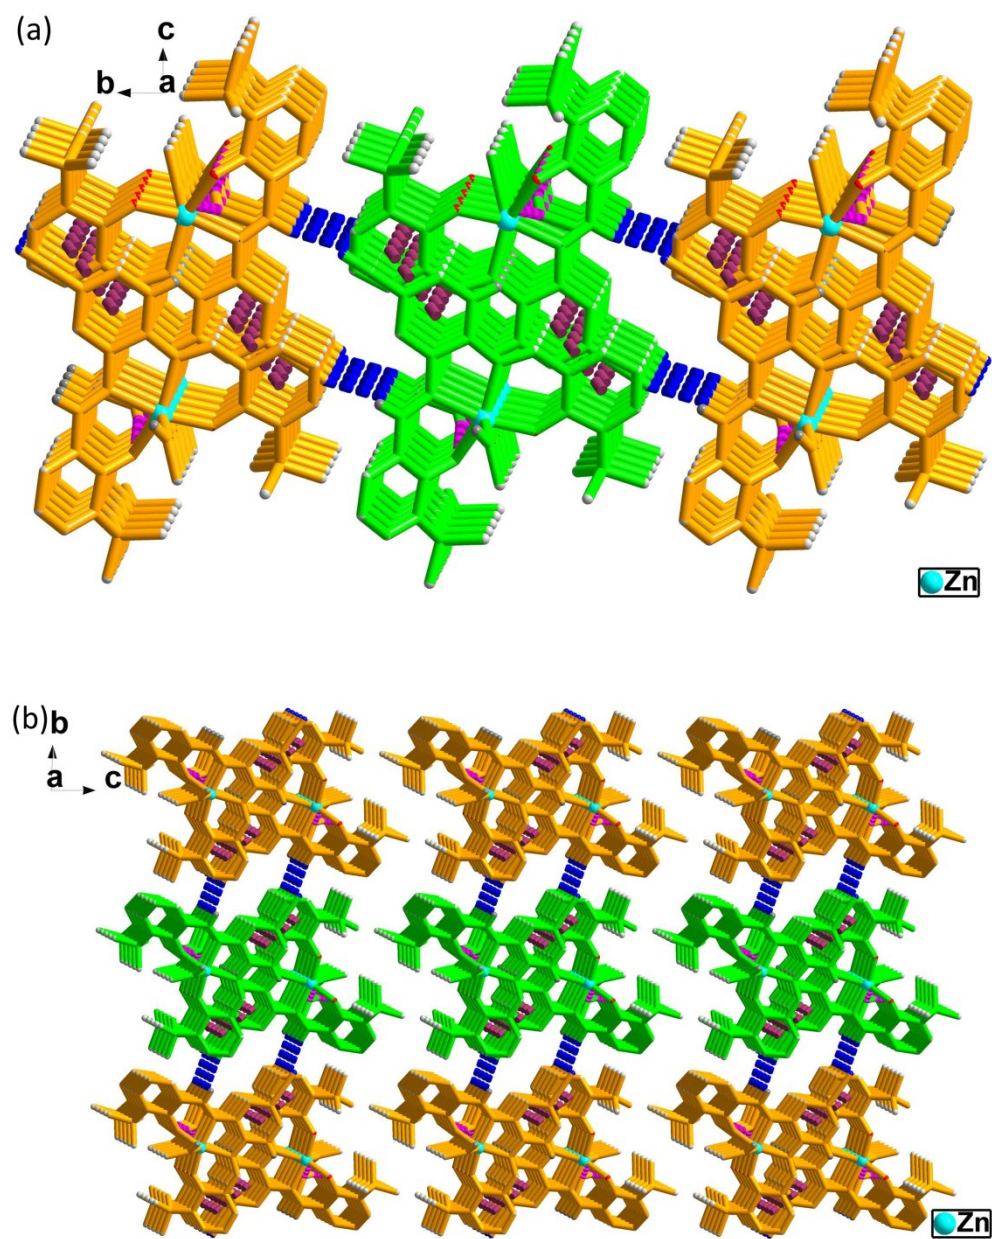

**Fig. S5** (a) Picture of the 2D layer of complex 1 assembly based on a nonclassical H-bonding (C8-H8A...N3, 2.530 Å, 3.441 Å, 166.53°) from *a* axis; (b) the 3D stacking picture formed *via* van der Waals interactions viewed down from *a* axis (hydrogen atoms without forming H-bonds are omitted for clarity).

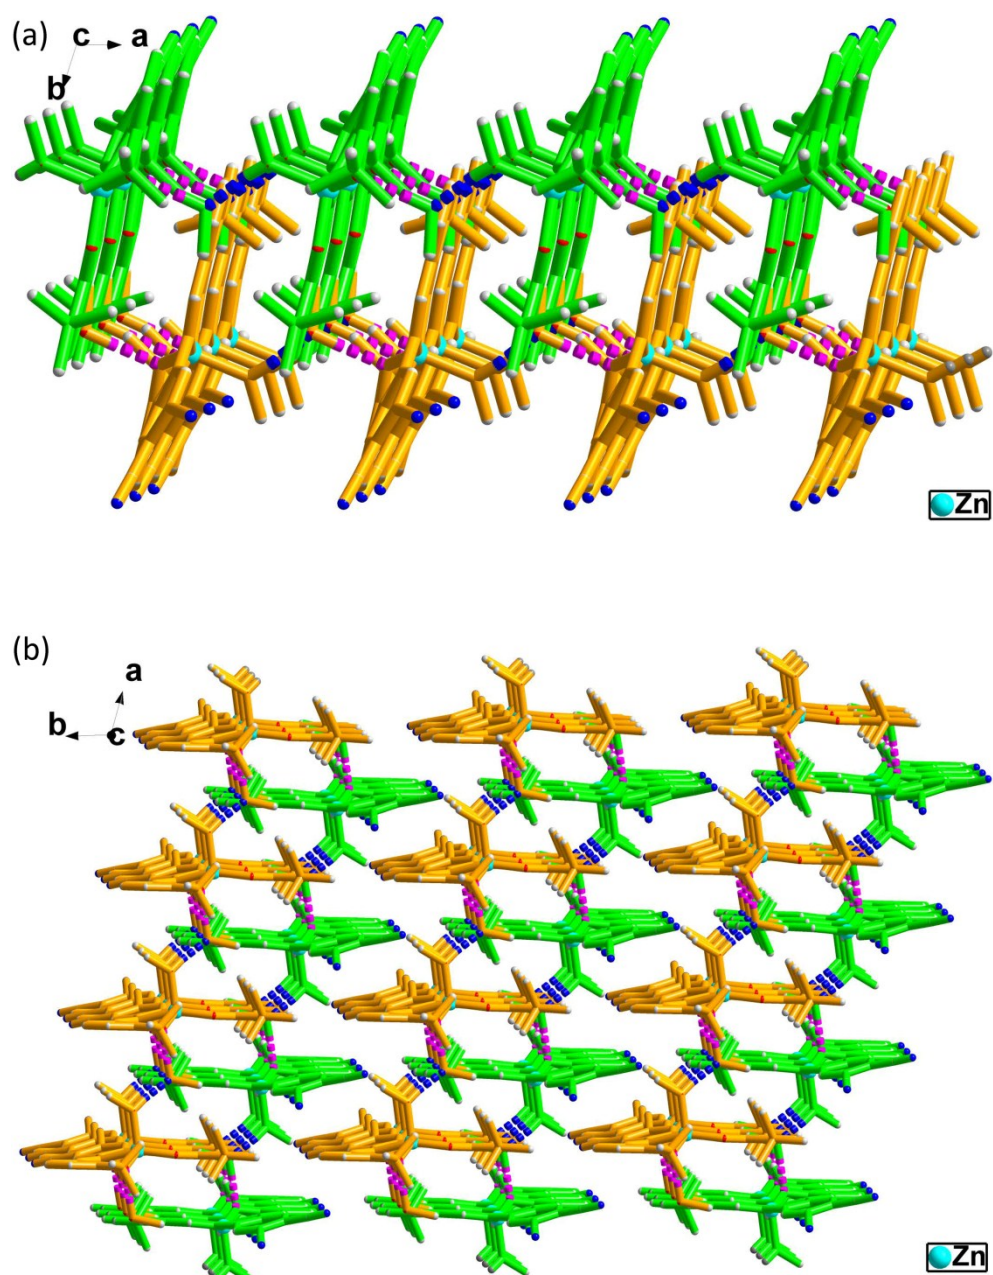

**Fig. S6** (a) Picture of the 2D layer of complex **3** assembly based on Van der Waals' force from *c* axis; (b) the 3D stacking picture also formed *via* van der waals interactions viewed down (d) from *c* axis (hydrogen atoms without forming H-bonds are omitted for clarity).



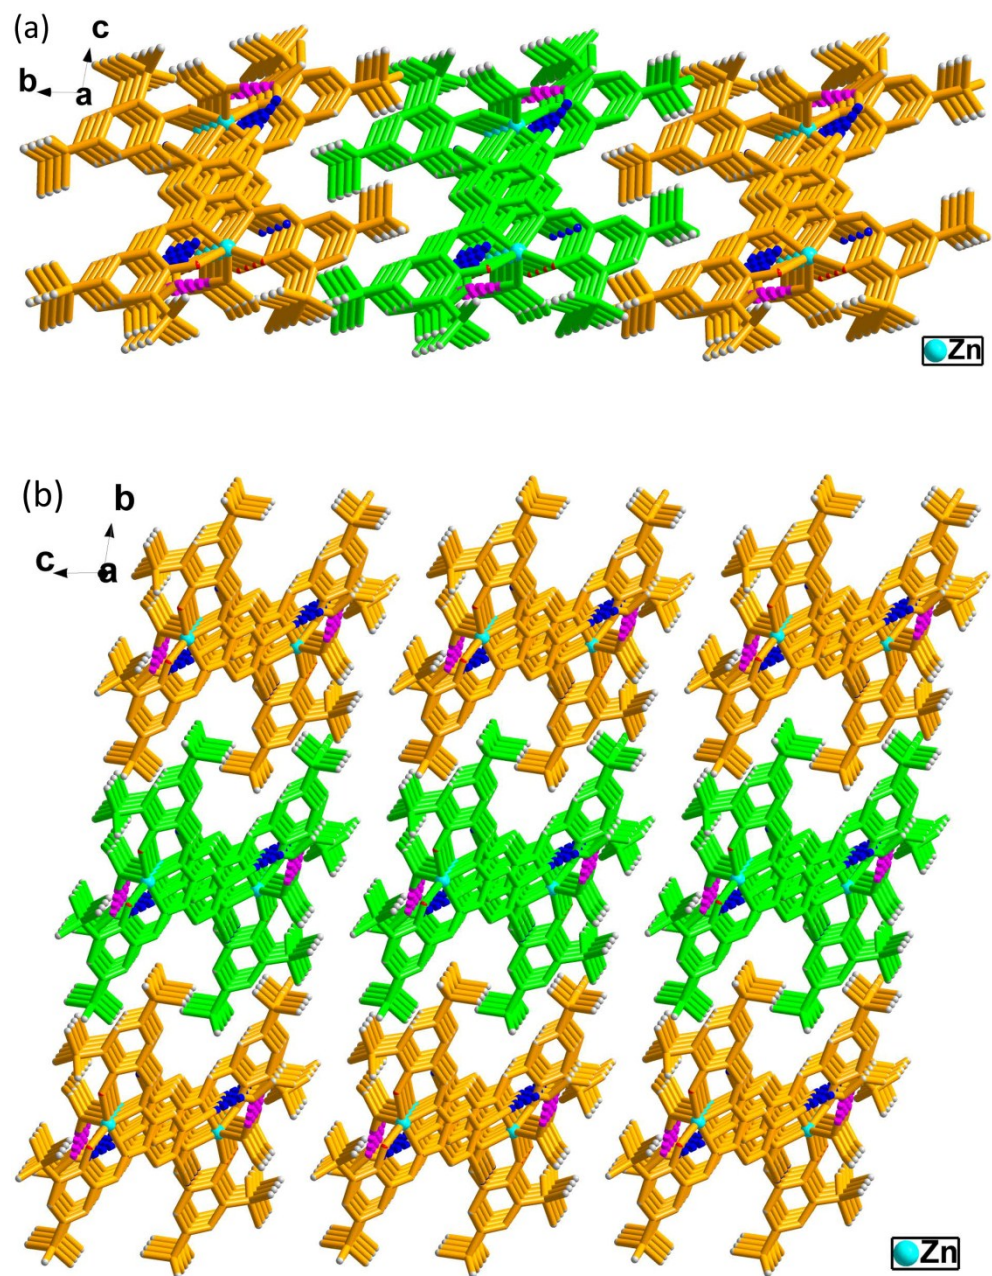

**Fig. S7** (a) Picture of the 2D layer of complex 4 assembly based on Van der Waals' force from *a* axis; (b) the 3D stacking picture also formed *via* van der Waals interactions viewed down (d) from *a* axis (hydrogen atoms without forming H-bonds are omitted for clarity).

**Table S1** Crystallographic data for **1**, **2**, **3** and **4**.

| Complexes                                                                | <b>1</b>                                                         | <b>2</b>                                                                      | <b>3</b>                                                         | <b>4</b>                                                         |
|--------------------------------------------------------------------------|------------------------------------------------------------------|-------------------------------------------------------------------------------|------------------------------------------------------------------|------------------------------------------------------------------|
| Formula                                                                  | C <sub>31</sub> H <sub>37</sub> N <sub>3</sub> O <sub>4</sub> Zn | C <sub>75</sub> H <sub>94</sub> N <sub>6</sub> O <sub>5</sub> Zn <sub>2</sub> | C <sub>32</sub> H <sub>36</sub> N <sub>4</sub> O <sub>4</sub> Zn | C <sub>42</sub> H <sub>56</sub> N <sub>4</sub> O <sub>4</sub> Zn |
| <i>M</i> /mol <sup>-1</sup>                                              | 581.00                                                           | 1290.30                                                                       | 606.02                                                           | 746.27                                                           |
| <i>T</i> /K                                                              | 296(2)                                                           | 296(2)                                                                        | 296(2)                                                           | 296(2)                                                           |
| Crystal system                                                           | Triclinic                                                        | Orthorhombic                                                                  | Triclinic                                                        | Triclinic                                                        |
| Space group                                                              | <i>P</i> -1                                                      | <i>Pbca</i>                                                                   | <i>P</i> -1                                                      | <i>P</i> -1                                                      |
| <i>a</i> /Å                                                              | 7.3914(10)                                                       | 31.102(6)                                                                     | 7.3811(13)                                                       | 10.8277(9)                                                       |
| <i>b</i> /Å                                                              | 11.1728(15)                                                      | 13.649(3)                                                                     | 13.9023(18)                                                      | 13.0401(9)                                                       |
| <i>c</i> /Å                                                              | 18.077(2)                                                        | 33.418(7)                                                                     | 16.664(2)                                                        | 15.7196(13)                                                      |
| $\alpha$ /°                                                              | 88.210(3)                                                        | 90.00                                                                         | 99.06(3)                                                         | 96.621(2)                                                        |
| $\beta$ /°                                                               | 79.092(4)                                                        | 90.00                                                                         | 102.13(2)                                                        | 101.707(3)                                                       |
| $\gamma$ /°                                                              | 87.909(5)                                                        | 90.00                                                                         | 104.723(18)                                                      | 102.6800(10)                                                     |
| <i>V</i> /Å <sup>3</sup>                                                 | 1464.5(3)                                                        | 14186(5)                                                                      | 1576.2(5)                                                        | 2090.5(3)                                                        |
| <i>Z</i>                                                                 | 2                                                                | 8                                                                             | 2                                                                | 2                                                                |
| F(000)                                                                   | 612                                                              | 5488                                                                          | 636                                                              | 796                                                              |
| $\rho$ (calculated)/g·cm <sup>-3</sup>                                   | 1.318                                                            | 1.208                                                                         | 1.277                                                            | 1.186                                                            |
| $\mu$ (Mo Ka)/mm <sup>-1</sup>                                           | 0.878                                                            | 0.729                                                                         | 0.820                                                            | 0.630                                                            |
| 2 $\theta$ range/°                                                       | 2.13-26.99                                                       | 1.38-25.32                                                                    | 1.55-24.98                                                       | 2.498-28.378                                                     |
| Reflns collected                                                         | 16333                                                            | 89615                                                                         | 8602                                                             | 41720                                                            |
| Independent reflns                                                       | 6359                                                             | 12890                                                                         | 5389                                                             | 10359                                                            |
| <i>R</i> <sub>int</sub>                                                  | 0.0467                                                           | 0.1432                                                                        | 0.1279                                                           | 0.0877                                                           |
| Data/restraints/parameters                                               | 6359/0/354                                                       | 12890/108/794                                                                 | 5389/0/372                                                       | 10359/78/497                                                     |
| <i>R</i> <sub>1</sub> <sup>a</sup> [ <i>I</i> >2 $\sigma$ ( <i>I</i> )]  | 0.0667                                                           | 0.0653                                                                        | 0.1108                                                           | 0.0567                                                           |
| <i>wR</i> <sub>2</sub> <sup>b</sup> [ <i>I</i> >2 $\sigma$ ( <i>I</i> )] | 0.1938                                                           | 0.1644                                                                        | 0.1782                                                           | 0.1150                                                           |
| <i>R</i> <sub>1</sub> (all data)                                         | 0.0908                                                           | 0.1543                                                                        | 0.2595                                                           | 0.1201                                                           |
| <i>wR</i> <sub>2</sub> (all data)                                        | 0.2137                                                           | 0.2058                                                                        | 0.2209                                                           | 0.1391                                                           |
| Goodness-of-fit on <i>F</i> <sup>2</sup>                                 | 1.044                                                            | 1.025                                                                         | 1.101                                                            | 1.041                                                            |
| $\Delta\rho_{\max,\min}$ /e Å <sup>-3</sup>                              | 1.810, -0.521                                                    | 0.526, -0.739                                                                 | 1.022, -1.010                                                    | 0.502, -0.412                                                    |

$$^a R_1 = \frac{\sum ||F_o| - |F_c||}{\sum |F_o|}; \quad ^b wR_2 = \frac{\sum [w(F_o^2 - F_c^2)^2]}{\sum [w(F_o^2)^2]}^{1/2}$$

**Table S2.** Selected bond distances (Å) and angles (°) for **1**

|           |             |            |             |
|-----------|-------------|------------|-------------|
| Zn1—O3    | 1.937 (3)   | O3—Zn1—O1  | 100.14 (14) |
| Zn1—O2    | 2.002 (3)   | O2—Zn1—O1  | 101.92 (13) |
| Zn1—N1    | 2.078 (3)   | N1—Zn1—O1  | 104.38 (14) |
| Zn1—N2    | 2.080 (3)   | N2—Zn1—O1  | 94.79 (13)  |
| Zn1—O1    | 2.087 (3)   | C14—O2—Zn1 | 121.3 (2)   |
| O3—Zn1—O2 | 97.54 (12)  | C24—O3—Zn1 | 129.3 (3)   |
| O3—Zn1—N1 | 90.77 (13)  | C8—N2—Zn1  | 120.8 (3)   |
| O2—Zn1—N1 | 150.52 (13) | C2—N2—Zn1  | 114.7 (3)   |
| O3—Zn1—N2 | 163.46 (14) | C31—O1—Zn1 | 119.9 (3)   |
| O2—Zn1—N2 | 86.22 (12)  | C26—N1—Zn1 | 121.6 (3)   |
| N1—Zn1—N2 | 78.57 (13)  | C1—N1—Zn1  | 115.1 (3)   |

\

**Table S3.** Selected bond distances (Å) and angles (°) for **2**.

|            |             |             |             |
|------------|-------------|-------------|-------------|
| Zn1—O1     | 1.924 (4)   | C24—O2—Zn1  | 118.7 (3)   |
| Zn1—O2     | 1.973 (3)   | C10—O1—Zn1  | 131.2 (4)   |
| Zn1—N1     | 2.047 (4)   | C8—N1—Zn1   | 124.0 (4)   |
| Zn1—N2     | 2.083 (4)   | C6—N1—Zn1   | 114.6 (3)   |
| Zn1—N6i    | 2.094 (5)   | C22—N2—Zn1  | 121.4 (3)   |
| Zn2—O3     | 1.937 (3)   | C5—N2—Zn1   | 113.8 (3)   |
| Zn2—O4     | 1.942 (4)   | C1—N6—Zn1ii | 168.6 (5)   |
| Zn2—O5     | 2.075 (4)   | O4—Zn2—N3   | 151.28 (16) |
| Zn2—N3     | 2.077 (4)   | O5—Zn2—N3   | 103.53 (14) |
| Zn2—N4     | 2.079 (4)   | O3—Zn2—N4   | 160.83 (16) |
| O1—Zn1—O2  | 98.98 (15)  | O4—Zn2—N4   | 88.41 (15)  |
| O1—Zn1—N1  | 90.50 (16)  | O5—Zn2—N4   | 97.73 (15)  |
| O2—Zn1—N1  | 148.42 (16) | N3—Zn2—N4   | 78.79 (16)  |
| O1—Zn1—N2  | 166.54 (17) | C63—O3—Zn2  | 132.4 (3)   |
| O2—Zn1—N2  | 86.33 (15)  | C47—O4—Zn2  | 131.8 (3)   |
| N1—Zn1—N2  | 78.83 (16)  | C61—N3—Zn2  | 123.6 (3)   |
| O1—Zn1—N6i | 99.57 (18)  | C43—N3—Zn2  | 113.6 (3)   |
| O2—Zn1—N6i | 98.04 (16)  | C45—N4—Zn2  | 123.2 (4)   |
| N1—Zn1—N6i | 110.05 (18) | C42—N4—Zn2  | 113.5 (3)   |
| N2—Zn1—N6i | 91.85 (18)  | C60—O5—Zn2  | 127.0 (4)   |

Symmetry codes: (i)  $-x+1, y, -z+1/2$ .

**Table S4.** Selected bond distances (Å) and angles (°) for **3**

|           |           |            |           |
|-----------|-----------|------------|-----------|
| Zn1—O2    | 1.965 (5) | O2—Zn1—N2  | 157.4 (2) |
| Zn1—O1    | 1.986 (6) | O1—Zn1—N2  | 85.8 (2)  |
| Zn1—O3    | 2.033 (6) | O3—Zn1—N2  | 99.6 (3)  |
| Zn1—N1    | 2.071 (7) | N1—Zn1—N2  | 79.6 (3)  |
| Zn1—N2    | 2.104 (6) | C11—O1—Zn1 | 125.6 (5) |
| O2—Zn1—O1 | 94.9 (2)  | C22—O2—Zn1 | 133.5 (5) |
| O2—Zn1—O3 | 102.0 (3) | C9—N2—Zn1  | 124.9 (5) |
| O1—Zn1—O3 | 105.6 (3) | C8—N2—Zn1  | 113.1 (5) |
| O2—Zn1—N1 | 89.3 (3)  | C32—O3—Zn1 | 128.8 (6) |
| O1—Zn1—N1 | 150.8 (2) | C20—N1—Zn1 | 124.5 (5) |
| O3—Zn1—N1 | 101.8 (3) | C7—N1—Zn1  | 113.5 (5) |

**Table S5.** Selected bond distances (Å) and angles (°) for **4**

|           |             |            |             |
|-----------|-------------|------------|-------------|
| Zn1—O2    | 1.935 (2)   | O2—Zn1—N2  | 163.02 (10) |
| Zn1—O3    | 1.942 (2)   | O3—Zn1—N2  | 88.35 (8)   |
| Zn1—N1    | 2.073 (2)   | N1—Zn1—N2  | 78.78 (9)   |
| Zn1—O1    | 2.073 (2)   | O1—Zn1—N2  | 94.40 (10)  |
| Zn1—N2    | 2.081 (2)   | C15—O3—Zn1 | 127.32 (19) |
| O2—Zn1—O3 | 96.93 (9)   | C1—N1—Zn1  | 124.08 (19) |
| O2—Zn1—N1 | 89.75 (9)   | C33—N1—Zn1 | 113.36 (17) |
| O3—Zn1—N1 | 153.69 (10) | C14—N2—Zn1 | 122.94 (19) |
| O2—Zn1—O1 | 100.26 (11) | C32—N2—Zn1 | 113.13 (17) |
| O3—Zn1—O1 | 101.68 (10) | C7—O2—Zn1  | 132.05 (19) |
| N1—Zn1—O1 | 102.11 (10) | C41—O1—Zn1 | 129.9 (6)   |

**Table S6.** Selected H-bonding distances (Å) and angles (°) for **1**.

| D-H    | d(D-H) | d(H···A) | ∠DHA   | d(D···A) | A  | Symmetry               |
|--------|--------|----------|--------|----------|----|------------------------|
| O1-H1A | 0.821  | 1.994    | 145.09 | 2.709    | O4 | $[x + 1, y, z]$        |
| O4-H4  | 0.820  | 1.910    | 166.75 | 2.715    | O2 |                        |
| C8-H8A | 0.930  | 2.530    | 166.53 | 3.441    | N3 | $[-x + 2, -y, -z + 1]$ |

**Table S7.** Selected H-bonding distances (Å) and angles (°) for **2**.

| D-H    | d(D-H) | d(H···A) | ∠DHA   | d(D···A) | A  | Symmetry |
|--------|--------|----------|--------|----------|----|----------|
| O5-H5D | 0.850  | 1.833    | 159.25 | 2.645    | O2 |          |

**Table S8.** Selected H-bonding distances (Å) and angles (°) for **3**.

| D-H   | d(D-H) | d(H···A) | ∠DHA   | d(D···A) | A  | Symmetry        |
|-------|--------|----------|--------|----------|----|-----------------|
| O3-H3 | 0.854  | 1.828    | 172.38 | 2.676    | O4 |                 |
| O4-H4 | 0.820  | 1.907    | 173.75 | 2.724    | O1 | $[x + 1, y, z]$ |

**Table S9.** Selected H-bonding distances (Å) and angles (°) for **4**.

| D-H    | d(D-H) | d(H···A) | ∠DHA   | d(D···A) | A  | Symmetry                   |
|--------|--------|----------|--------|----------|----|----------------------------|
| O1-H1  | 0.782  | 1.922    | 167.78 | 2.692    | O4 |                            |
| O4-H4A | 0.820  | 2.118    | 153.78 | 2.877    | N3 | $[-x + 2, -y + 1, -z + 1]$ |

4. X-ray powder diffraction of complexes **1**, **2**, **3** and **4**.

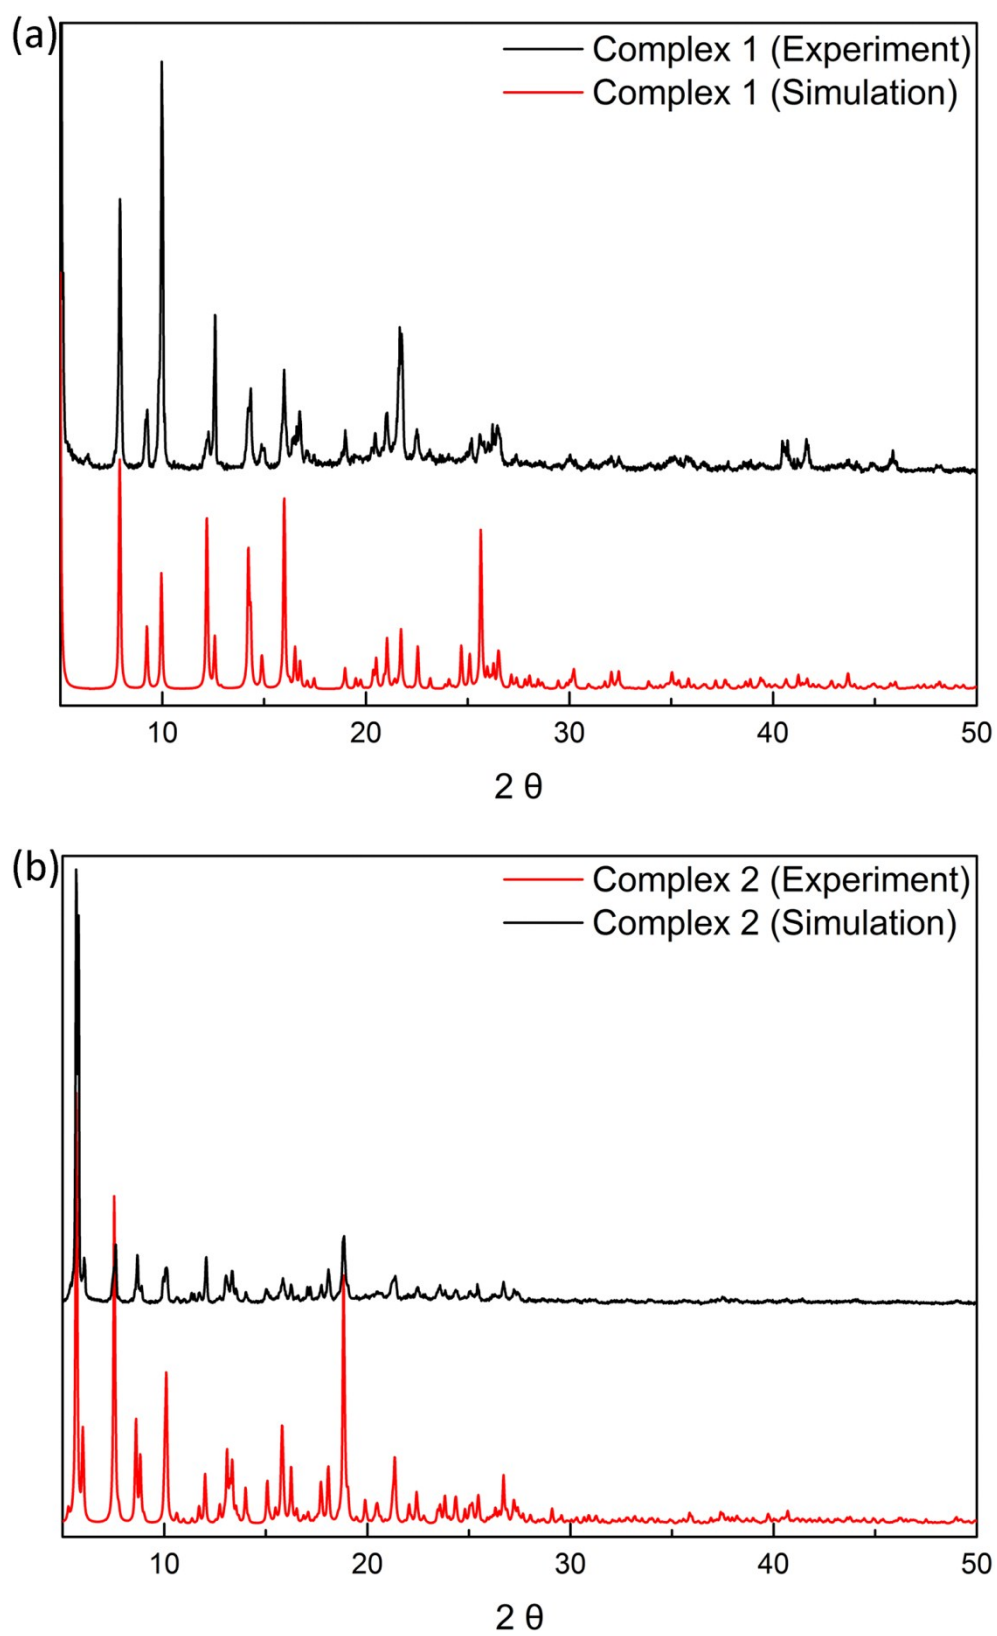

**Fig. S8** PXRD patterns show the comparison between the experimental value and calculated ones for **1** (a) and **2** (b).

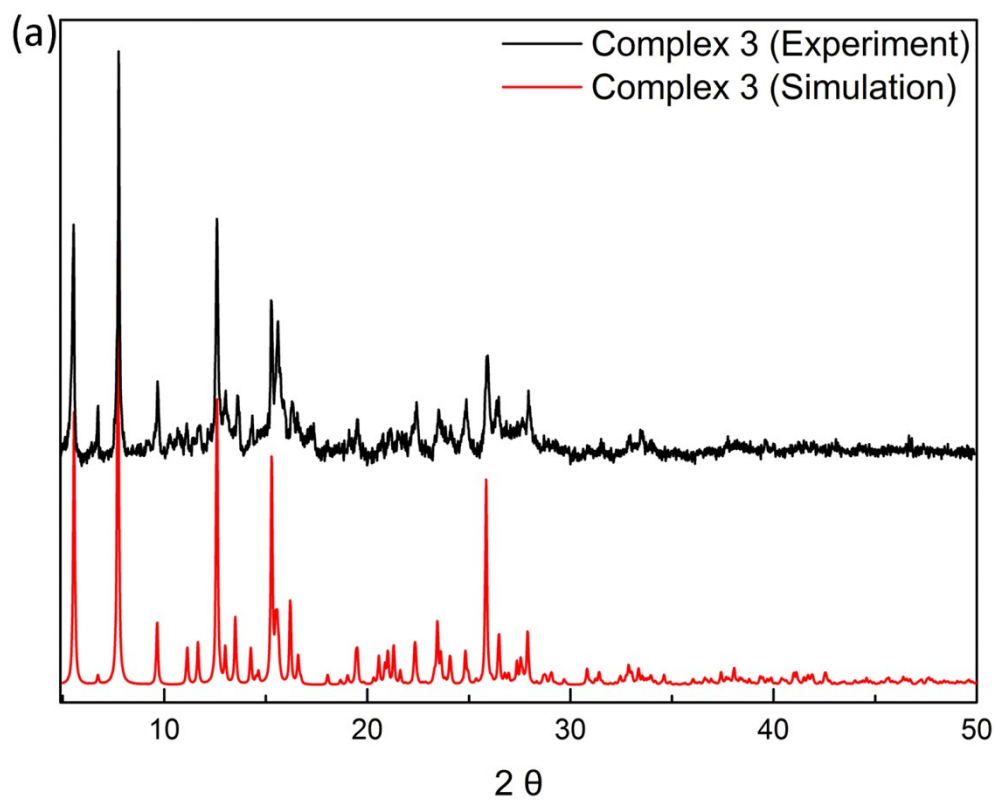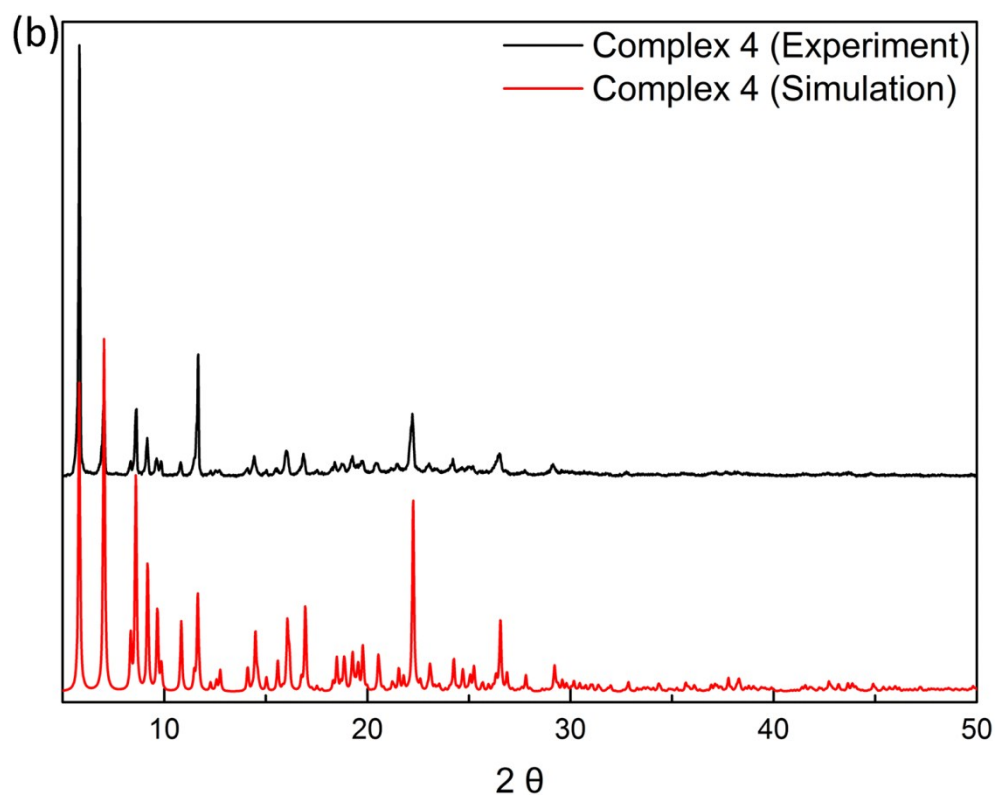

Fig. S9 PXRD patterns show the comparison between the experimental value and calculated ones for **3** (a) and **4** (b).



5. Thermal gravity analysis of complexes 1, 2, 3 and 4

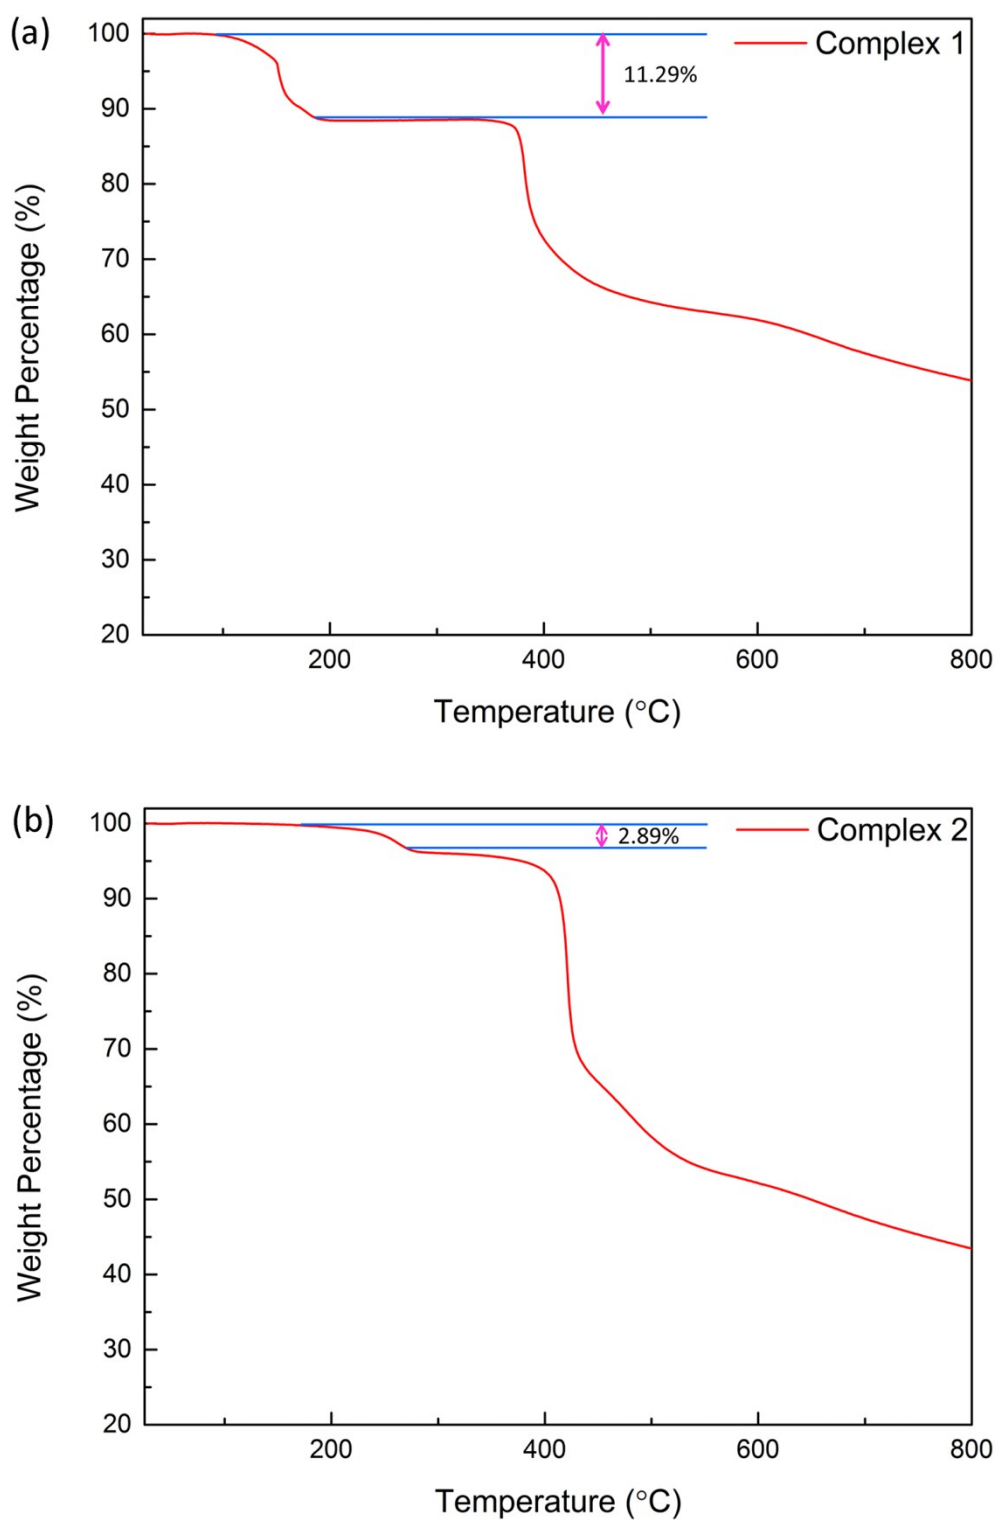

Fig. S10 TGA curves of complexes 1 (a) and 2 (b).

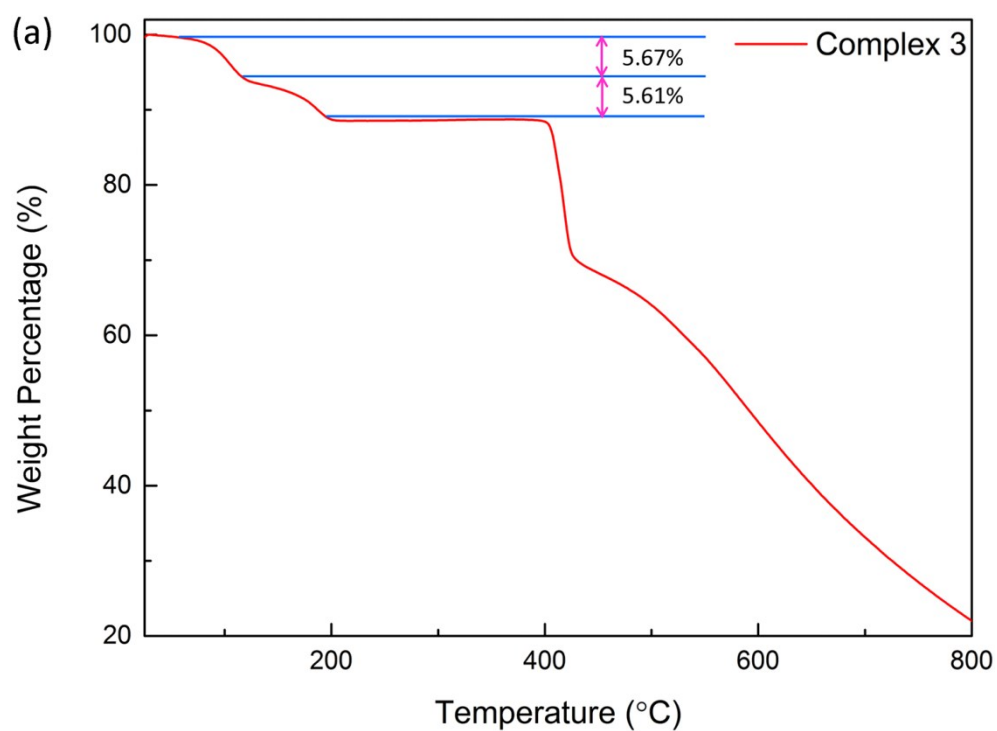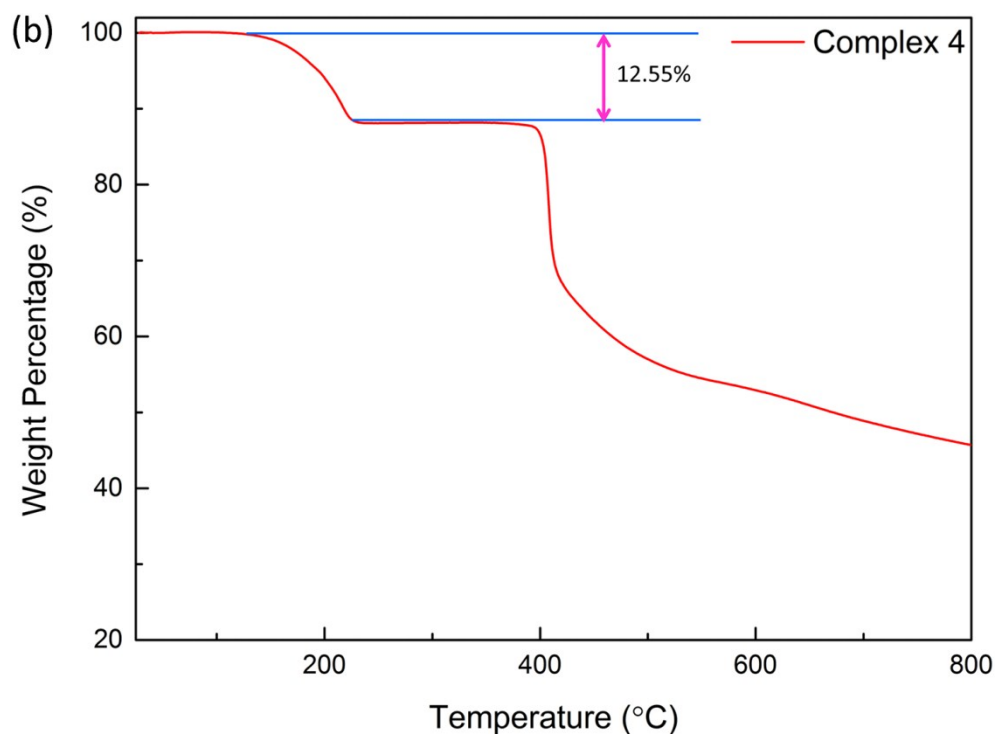

**Fig. S11** TGA curves of complexes **3** (a) and **4** (b).

6. UV-Vis spectra of complexes **1**, **2**, **3** and **4** in different kinds of solutions

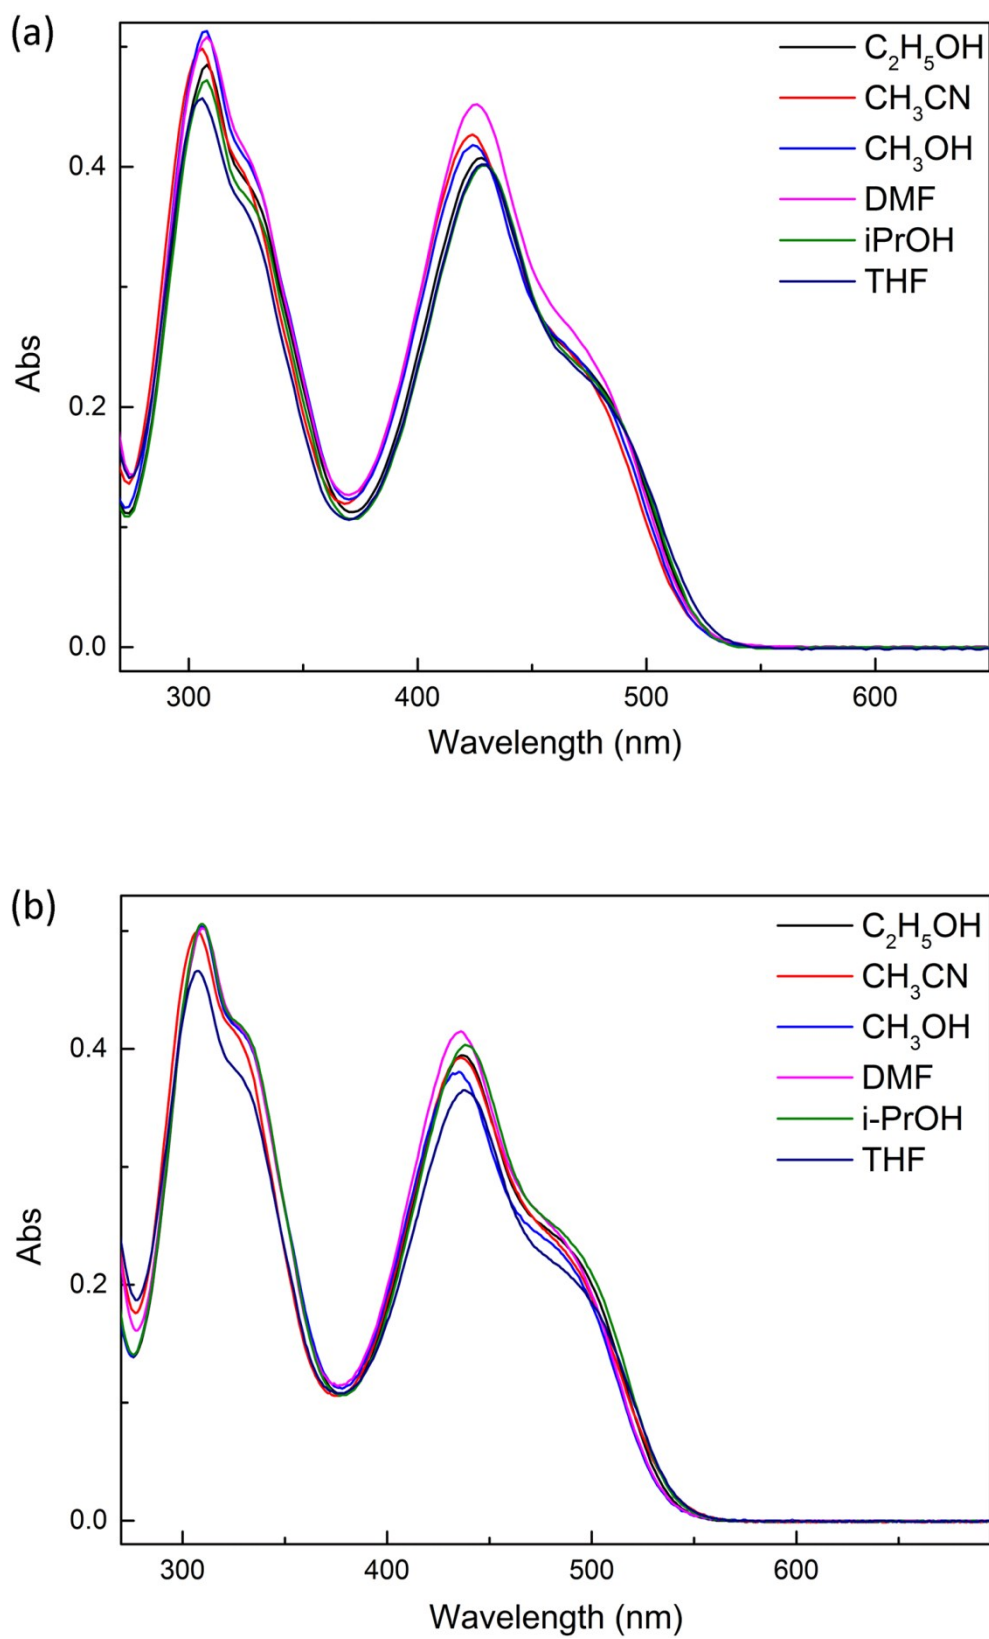

**Fig. S12** UV-Vis spectra of complexes **1** (2.5 × 10<sup>-5</sup> mol·L<sup>-1</sup>) (a) and **2** (2.5 × 10<sup>-5</sup> mol·L<sup>-1</sup>) (b) with different solutions.

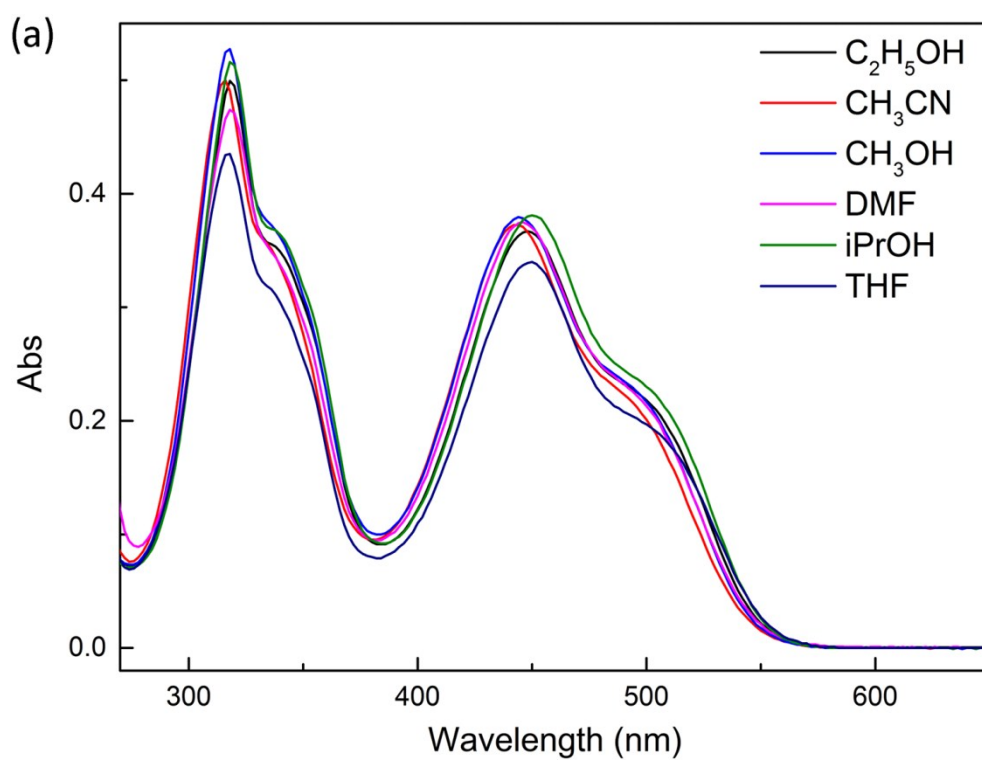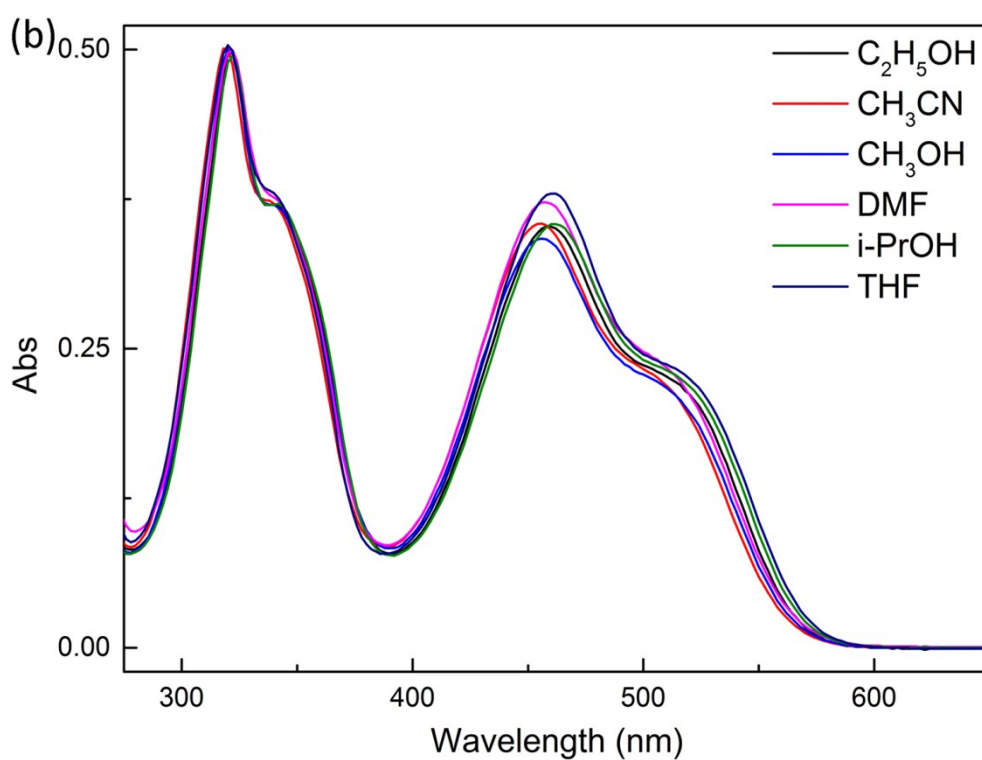

**Fig. S13** UV-Vis spectra of complexes **3** ( $2.5 \times 10^{-5} \text{ mol} \cdot \text{L}^{-1}$ ) (a) and **4** ( $2.5 \times 10^{-5} \text{ mol} \cdot \text{L}^{-1}$ ) (b) with different solutions.

7. Fluorescence spectra, quantum yield and lifetime of complexes **1**, **2**, **3** and **4**

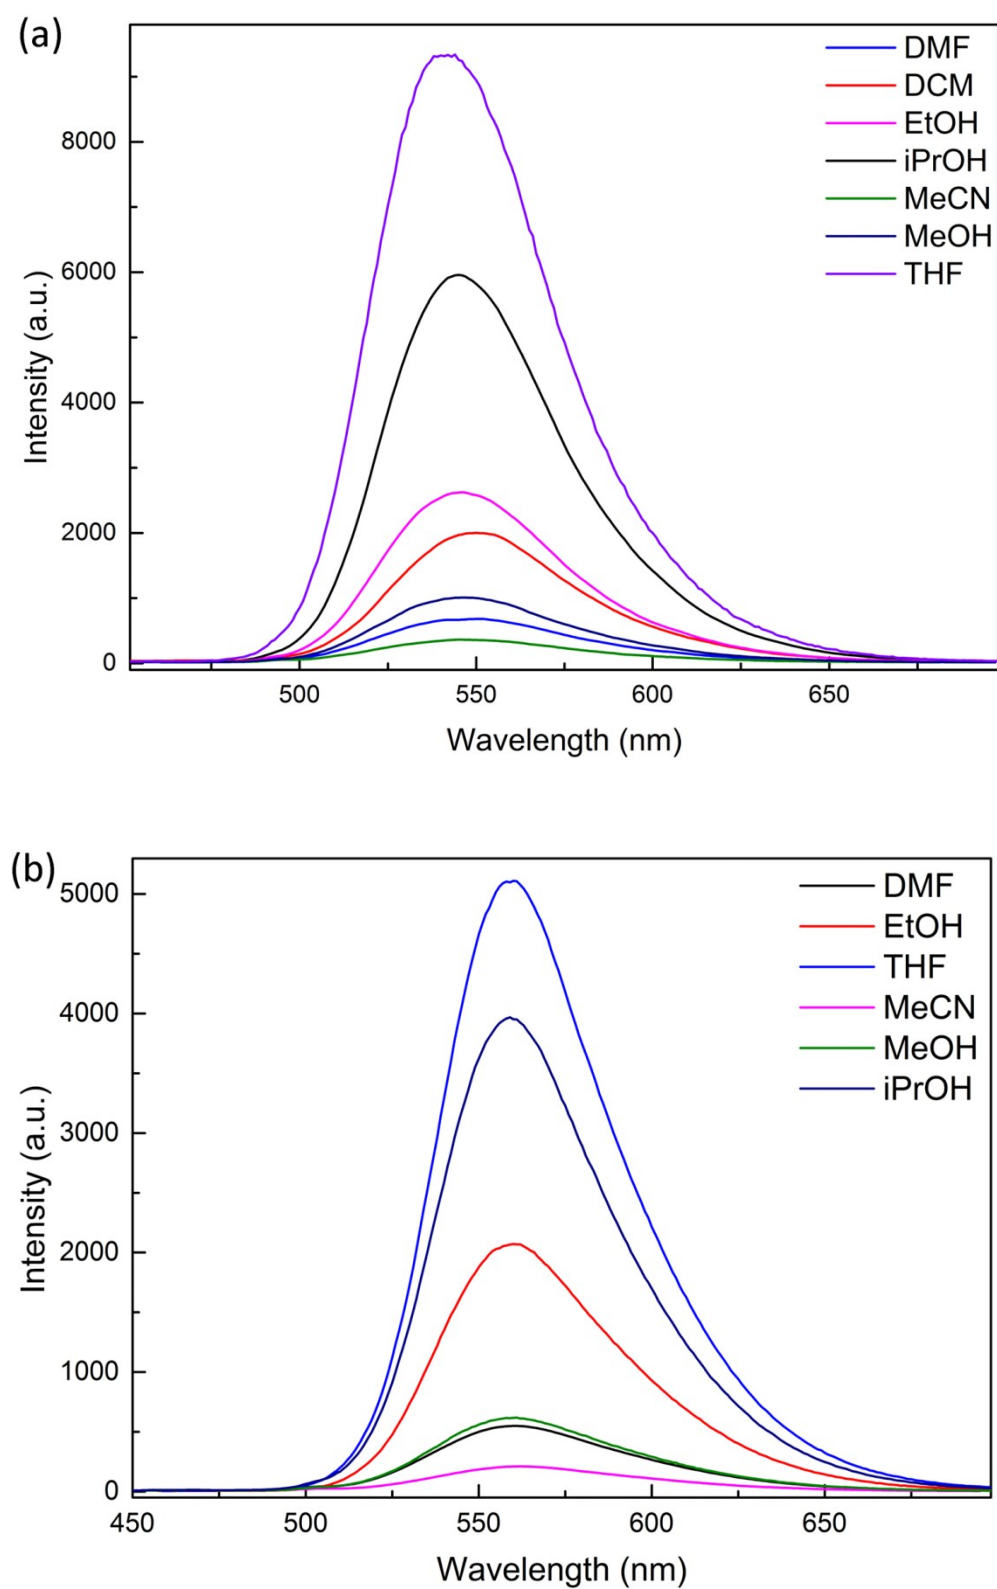

**Fig. S14** (a) Fluorescence ( $\lambda_{\text{exc}} = 445 \text{ nm}$ ) spectra of **1** ( $2.5 \times 10^{-5} \text{ mol} \cdot \text{L}^{-1}$ ) (a) and **2** ( $2.5 \times 10^{-5} \text{ mol} \cdot \text{L}^{-1}$ ) (b) with different kinds of solutions.

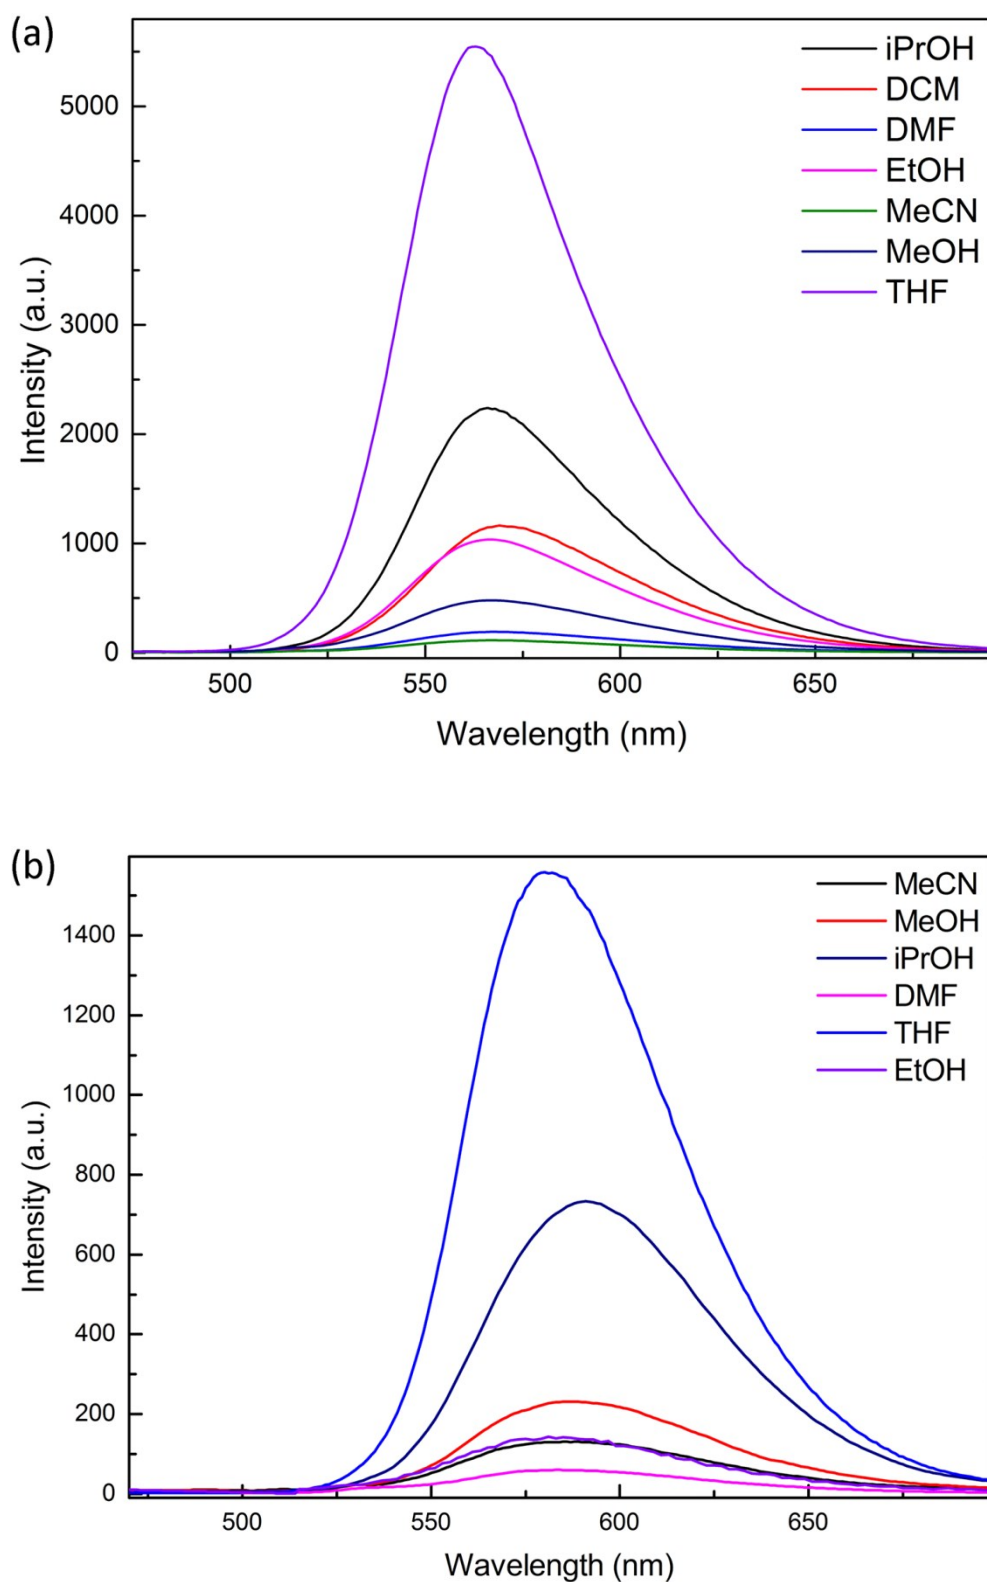

**Fig. S15** (a) Fluorescence ( $\lambda_{\text{exc}} = 445 \text{ nm}$ ) spectra of **3** ( $2.5 \times 10^{-5} \text{ mol} \cdot \text{L}^{-1}$ ) (a) and **4** ( $2.5 \times 10^{-5} \text{ mol} \cdot \text{L}^{-1}$ ) (b) with different kinds of solutions.

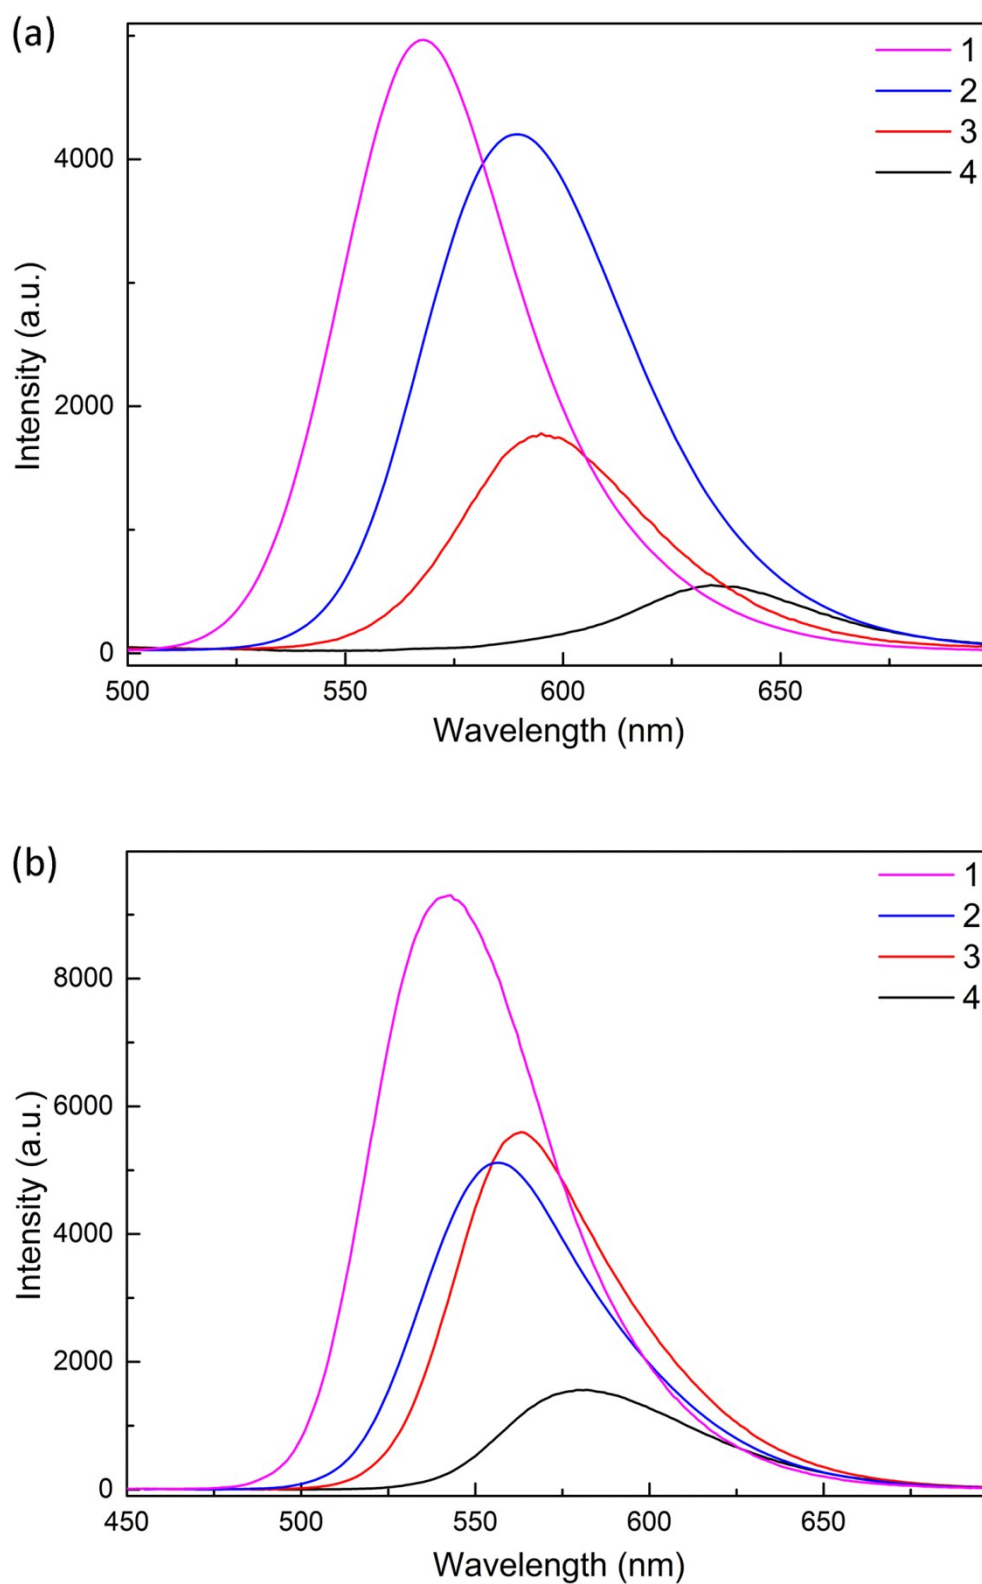

**Fig. S16** (a) Solid state fluorescence spectra ( $\lambda_{exc} = 385$  nm) of complexes **1**, **2**, **3** and **4**; (b) Fluorescence spectra ( $\lambda_{exc} = 445$  nm) of complexes **1**, **2**, **3** and **4** (concentration of every of them is  $2.5 \times 10^{-5} \text{ mol} \cdot \text{L}^{-1}$ ) in THF.

**Table S10** The absolute solid state fluorescence quantum yield and lifetime of **1**, **2**, **3** and **4**

|                                     | <b>1</b> | <b>2</b> | <b>3</b> | <b>4</b> |
|-------------------------------------|----------|----------|----------|----------|
| Absolute quantum yield ( $\Phi$ /%) | 73.24    | 50.97    | 10.50    | 4.61     |
| Lifetime (t/ns)                     | 0.702    | 1.198    | 0.606    | 0.449    |

**Table S11** The absolute fluorescence quantum yield and lifetime of **1**, **2**, **3** and **4** in THF solution

|                                     | <b>1</b> | <b>2</b> | <b>3</b> | <b>4</b> |
|-------------------------------------|----------|----------|----------|----------|
| Absolute quantum yield ( $\Phi$ /%) | 8.25     | 4.27     | 6.04     | 3.08     |
| Lifetime (t/ns)                     | 1.023    | 0.861    | 0.971    | 0.747    |

## 8. CIEE properties of complexes **1**, **2**, **3** and **4**

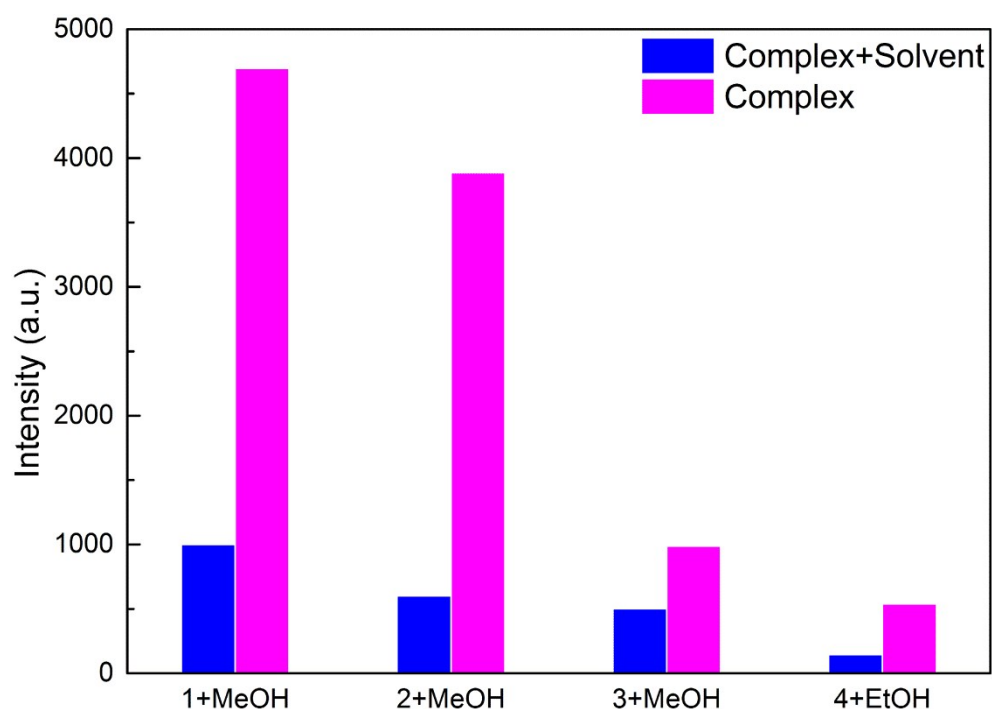

Fig. S17 Change of fluorescent emission intensity of complexes **1-4** from their solution state [ $\lambda_{\text{exc}} = 445$  nm; 542 nm of **1** ( $2.5 \times 10^{-5}$  mol L<sup>-1</sup>), 556 nm of **2** ( $2.5 \times 10^{-5}$  mol L<sup>-1</sup>), 563 nm of **3** ( $2.5 \times 10^{-5}$  mol L<sup>-1</sup>), 582 nm of **4** ( $2.5 \times 10^{-5}$  mol L<sup>-1</sup>) (the blue bar)] to their solid state [ $\lambda_{\text{exc}} = 385$  nm; 568 nm of **1**, 589 nm of **2**, 595 nm of **3**, 634 nm of **4** (the pink bar)]. The selected solutions are those from which crystal state **1-4** were obtained.



## 9. DFT and TD-DFT Computations of the ligands of complexes **1**, **2**, **3** and **4**

DFT and TD-DFT calculations were performed using the Gaussian 09 suite of programs.<sup>[1]</sup> Geometry optimizations and vertical excitations of Ligand **L1**, **L2**, **L3** and **L4** were obtained at the B3LYP/6-31G\* level of theory.

For **1**, the absorbance band around 407 nm is dominated by the HOMO → LUMO excitation, the details of the vertical excitation energies, oscillator strengths, and excitations nature are shown in Table S1.

**Table S12.** TD-DFT calculated electronic transition configurations for **L1**, **L2**, **L3**, and **L4** along with their corresponding excitation energies and oscillator strengths

| Compound | Spin State | Transition Configuration                   | Excitation      | Oscillator |
|----------|------------|--------------------------------------------|-----------------|------------|
|          |            |                                            | Energy (nm, eV) | Strength   |
| 1        | S1         | HOMO → LUMO (98%)                          | 407(3.05)       | 0.1847     |
|          | S2         | HOMO-1 → LUMO (96%)                        | 400(3.10)       | 0.0709     |
|          | S3         | HOMO-2 → LUMO (88%)                        | 376(3.29)       | 0.1512     |
| 2        | S1         | HOMO → LUMO (99%)                          | 411(3.01)       | 0.2086     |
|          | S2         | HOMO-1 → LUMO (96%)                        | 408(3.04)       | 0.0747     |
|          | S3         | HOMO-2 → LUMO (23%)<br>HOMO → LUMO+1 (68%) | 387(3.20)       | 0.1495     |
| 3        | S1         | HOMO → LUMO (99%)                          | 422(2.94)       | 0.161      |
|          | S2         | HOMO-1 → LUMO (98%)                        | 419(2.96)       | 0.0688     |
|          | S3         | HOMO-3 → LUMO (10%)<br>HOMO → LUMO+1 (88%) | 401(3.09)       | 0.1088     |
| 4        | S1         | HOMO → LUMO (99%)                          | 440(2.82)       | 0.1537     |
|          | S2         | HOMO-1 → LUMO (98%)                        | 425(2.92)       | 0.0770     |
|          | S3         | HOMO → LUMO+1 (93%)                        | 418(2.96)       | 0.1018     |

**Table S13.** Primary orbitals which contribute to the calculated transitions of **L1** (iso = 0.03).

| HOMO-4                                                                              | HOMO-2                                                                              | HOMO-1                                                                               | HOMO                                                                                  |
|-------------------------------------------------------------------------------------|-------------------------------------------------------------------------------------|--------------------------------------------------------------------------------------|---------------------------------------------------------------------------------------|
| 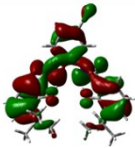 |  |  |  |
| LUMO                                                                                | LUMO+1                                                                              |                                                                                      |                                                                                       |
|  |  |                                                                                      |                                                                                       |

**Table S14.** Primary orbitals which contribute to the calculated transitions of **L2** (iso = 0.03).

| HOMO-3                                                                            | HOMO-2                                                                            | HOMO-1                                                                             | HOMO                                                                                |
|-----------------------------------------------------------------------------------|-----------------------------------------------------------------------------------|------------------------------------------------------------------------------------|-------------------------------------------------------------------------------------|
| 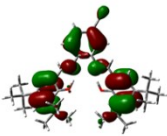 |  |  |  |
| LUMO                                                                              | LUMO+1                                                                            |                                                                                    |                                                                                     |
|  |  |                                                                                    |                                                                                     |

**Table S15.** Primary orbitals which contribute to the calculated transitions of **L3** (iso = 0.03).

| HOMO-3                                                                              | HOMO-1                                                                            | HOMO                                                                               | LUMO                                                                                |
|-------------------------------------------------------------------------------------|-----------------------------------------------------------------------------------|------------------------------------------------------------------------------------|-------------------------------------------------------------------------------------|
| 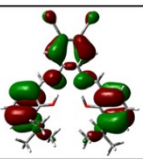   |  |  |  |
| LUMO+1                                                                              |                                                                                   |                                                                                    |                                                                                     |
|  |                                                                                   |                                                                                    |                                                                                     |

**Table S16.** Primary orbitals which contribute to the calculated transitions of **L4** (iso = 0.03).

| HOMO-3                                                                              | HOMO-1                                                                              | HOMO                                                                                 | LUMO                                                                                  |
|-------------------------------------------------------------------------------------|-------------------------------------------------------------------------------------|--------------------------------------------------------------------------------------|---------------------------------------------------------------------------------------|
| 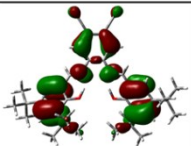 |  |  |  |
| LUMO+1                                                                              |                                                                                     |                                                                                      |                                                                                       |
|  |                                                                                     |                                                                                      |                                                                                       |

10. UV-vis titration of complexes **1**, **2**, **3** and **4** with F<sup>-</sup>, Cl<sup>-</sup> and Br<sup>-</sup> in THF

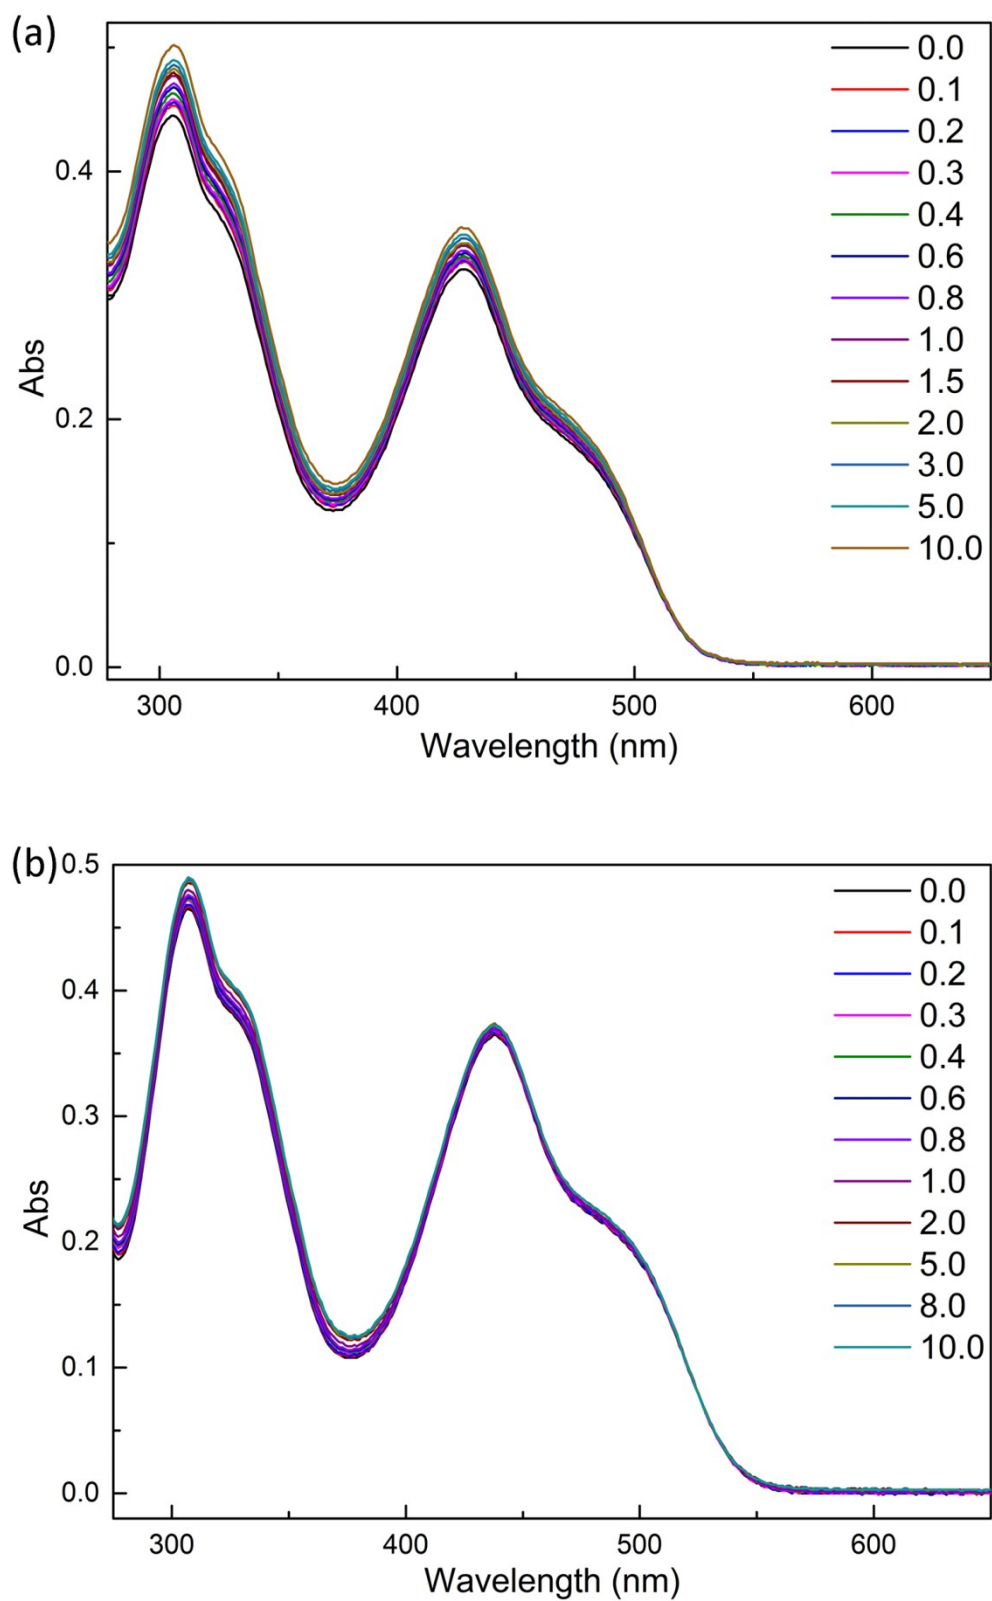

**Fig. S18** UV-Vis spectra of **1** and **2** upon titration of NaF in THF. (a) **1** ( $2.5 \times 10^{-5}$  mol L<sup>-1</sup>), NaF (0-10 eq); (b) **2** ( $2.5 \times 10^{-5}$  mol L<sup>-1</sup>), NaF (0-10 eq).

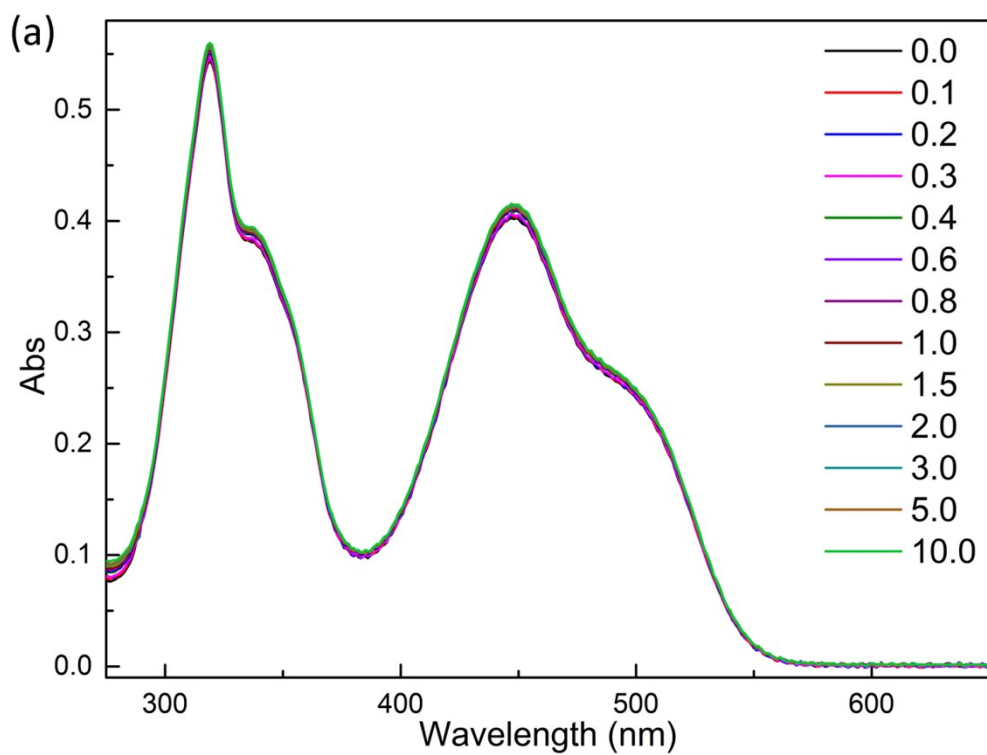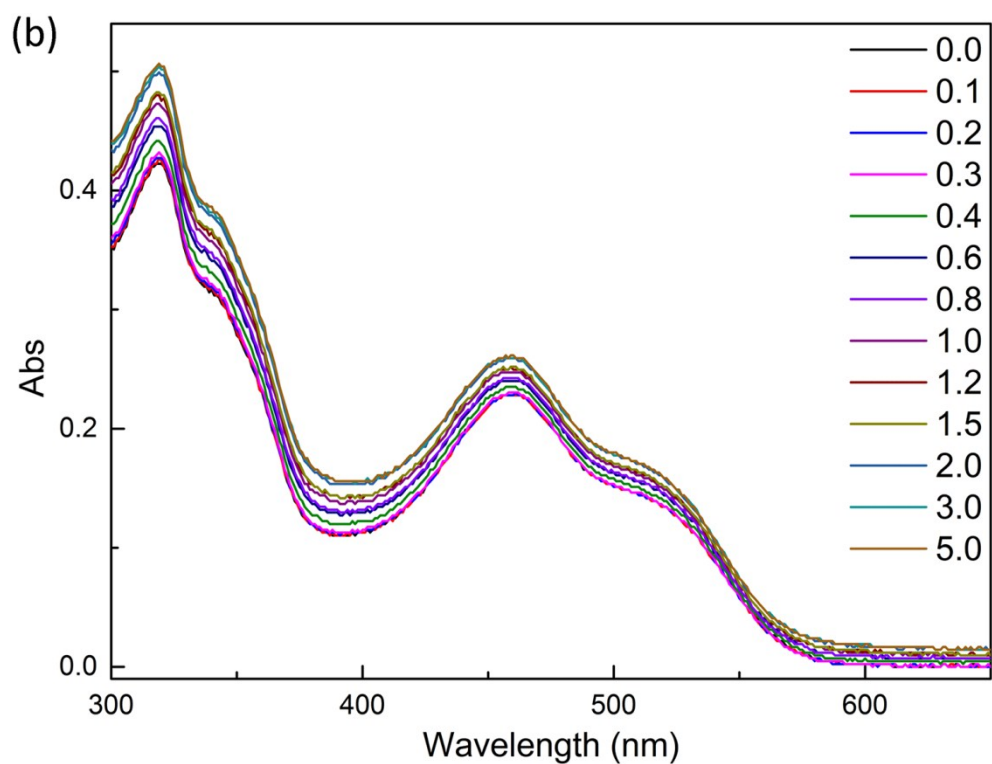

**Fig. S19** UV-Vis spectra of **3** and **4** upon titration of NaF in THF. (a) **3** ( $2.5 \times 10^{-5}$  mol L<sup>-1</sup>), NaF (0-10 eq); (b) **4** ( $2.5 \times 10^{-5}$  mol L<sup>-1</sup>), NaF (0-10 eq).

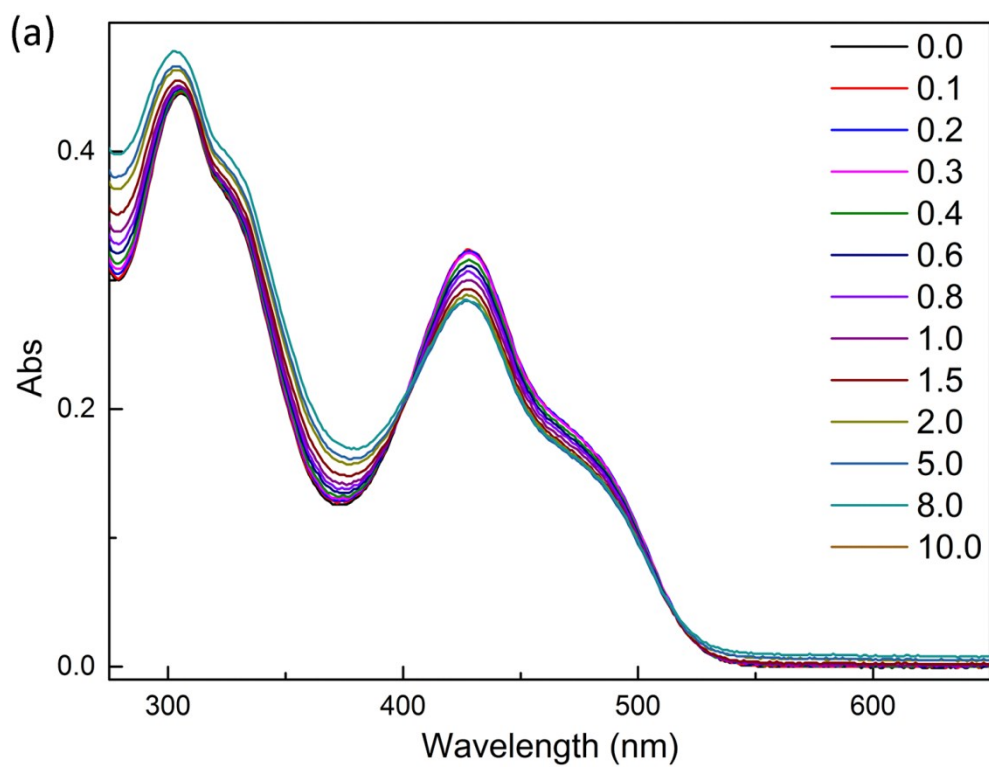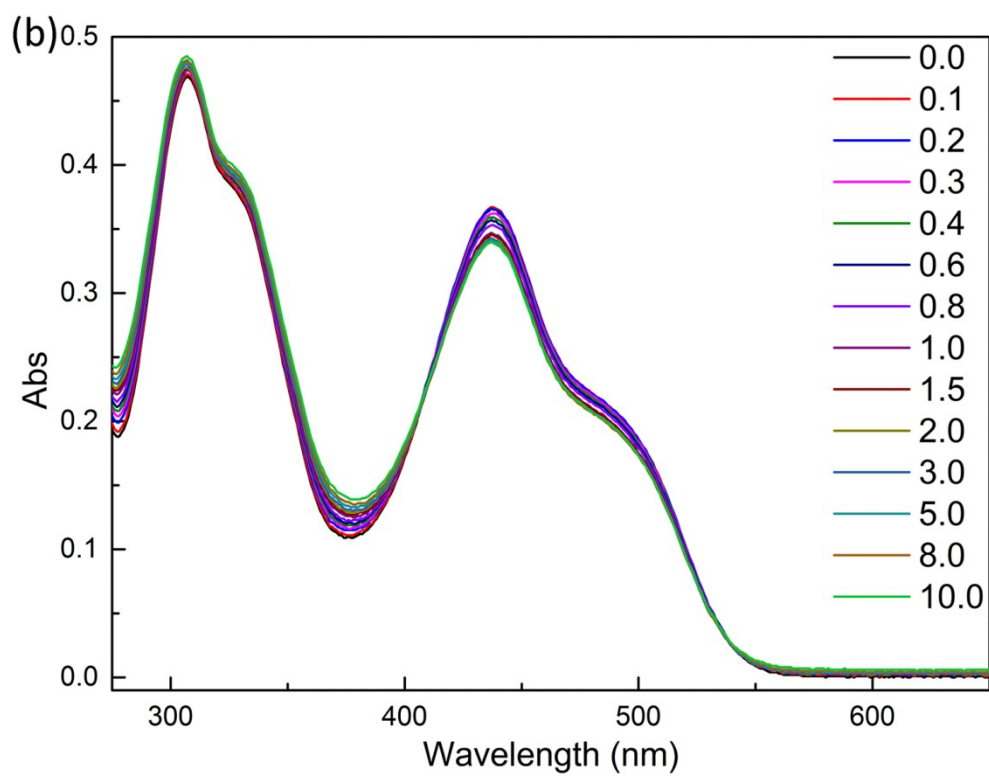

**Fig. S20** UV-vis spectra of **1** and **2** upon titration of NaCl in THF. (a) **1** ( $2.5 \times 10^{-5} \text{ mol L}^{-1}$ ), NaCl (0-10 eq); (b) **2** ( $2.5 \times 10^{-5} \text{ mol L}^{-1}$ ), NaCl (0-10 eq).

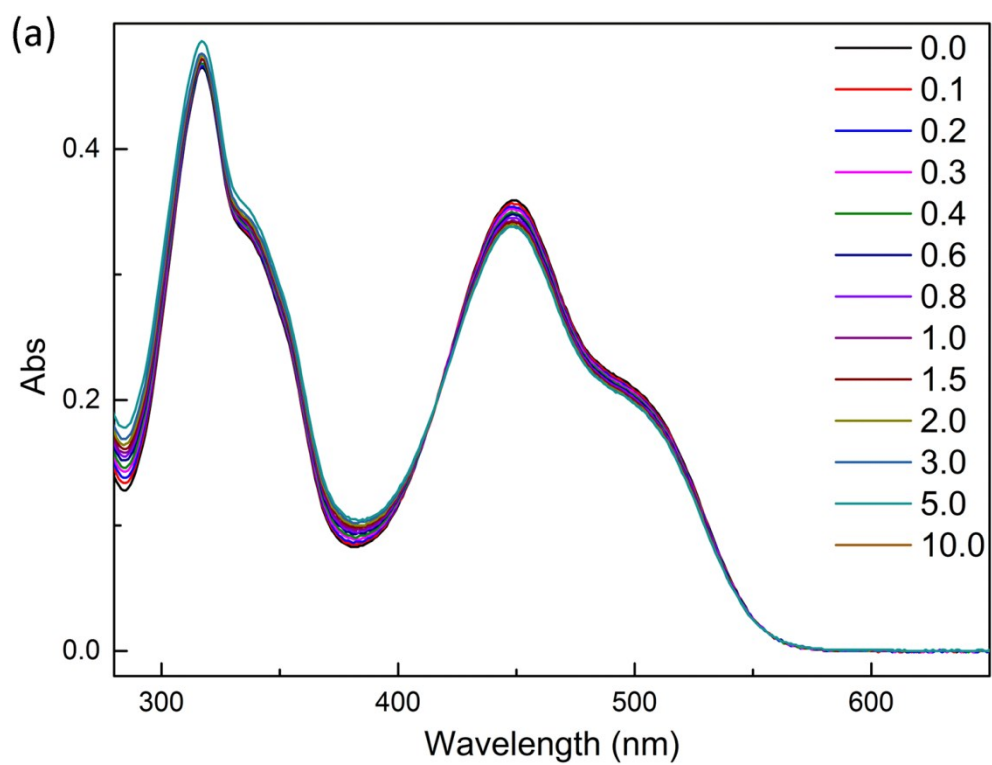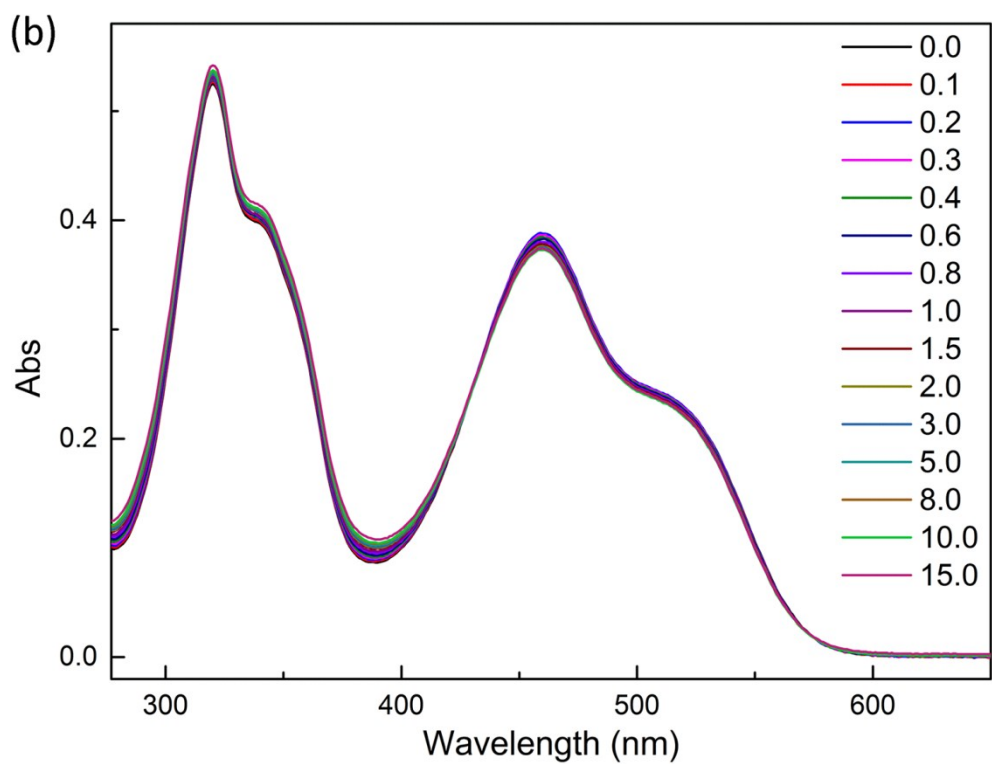

**Fig. S21** UV-vis spectra of **3** and **4** upon titration of NaCl in THF. (a) **3** ( $2.5 \times 10^{-5}$  mol L<sup>-1</sup>), NaCl (0-10 eq); (b) **4** ( $2.5 \times 10^{-5}$  mol L<sup>-1</sup>), NaCl (0-10 eq).

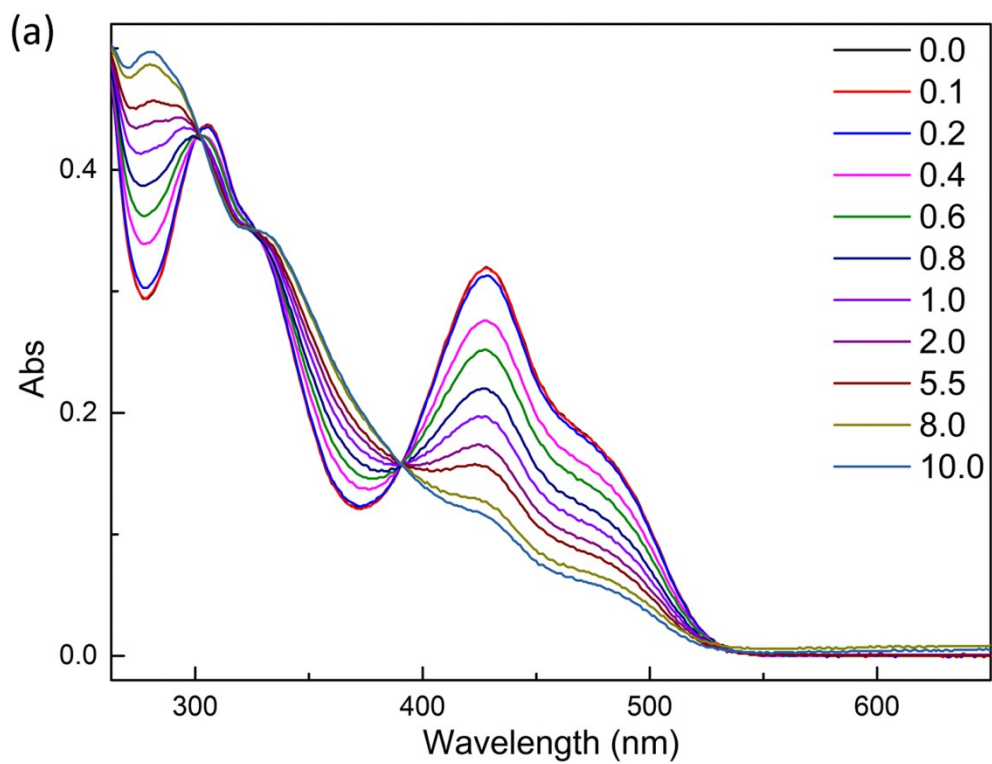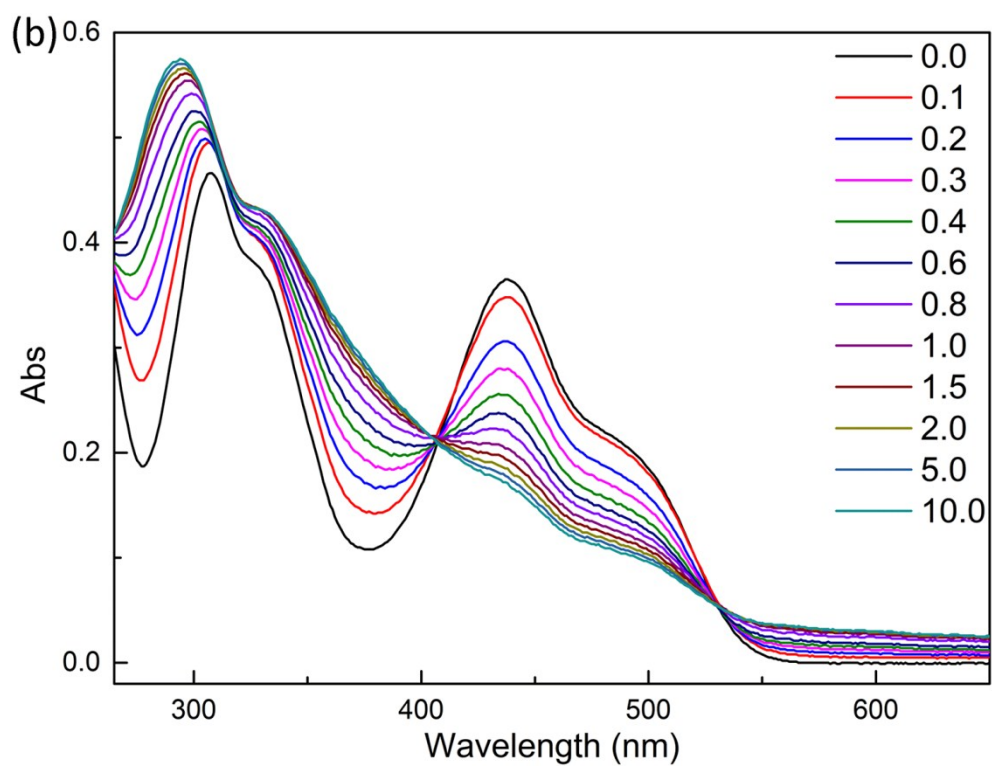

**Fig. S22** UV-vis spectra of **1** and **2** upon titration of NaBr in THF. (a) **1** ( $2.5 \times 10^{-5}$  mol L<sup>-1</sup>), NaBr (0-10 eq); (b) **2** ( $2.5 \times 10^{-5}$  mol L<sup>-1</sup>), NaBr (0-10 eq).

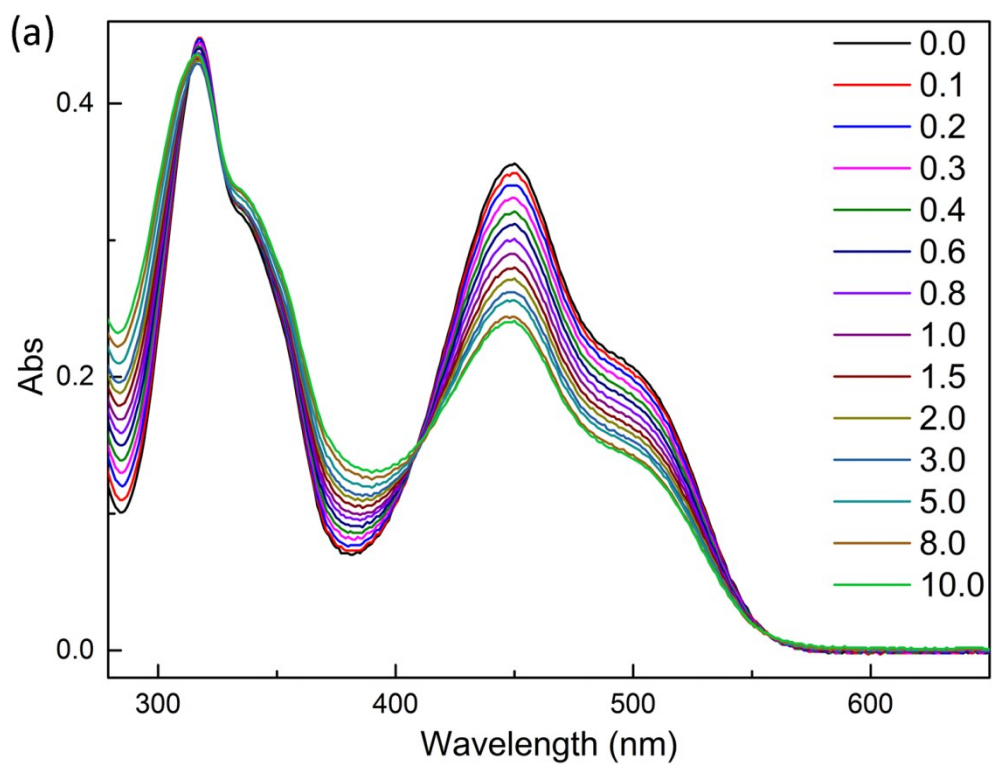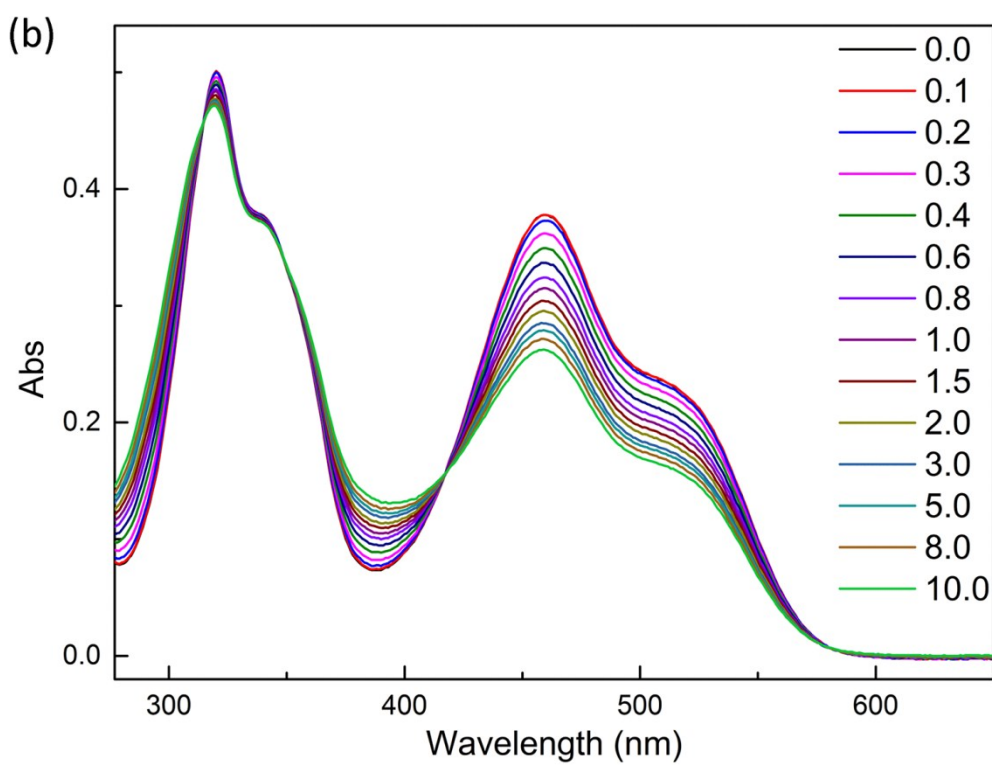

**Fig. S23** UV-vis spectra of **3** and **4** upon titration of NaBr in THF. (a) **3** ( $2.5 \times 10^{-5} \text{ mol L}^{-1}$ ), NaBr (0-10 eq); (b) **4** ( $2.5 \times 10^{-5} \text{ mol L}^{-1}$ ), NaBr (0-10 eq)..



11. Fluorescence titration of complexes **1**, **2**, **3** and **4** with F<sup>-</sup>, Cl<sup>-</sup> and Br<sup>-</sup> in THF

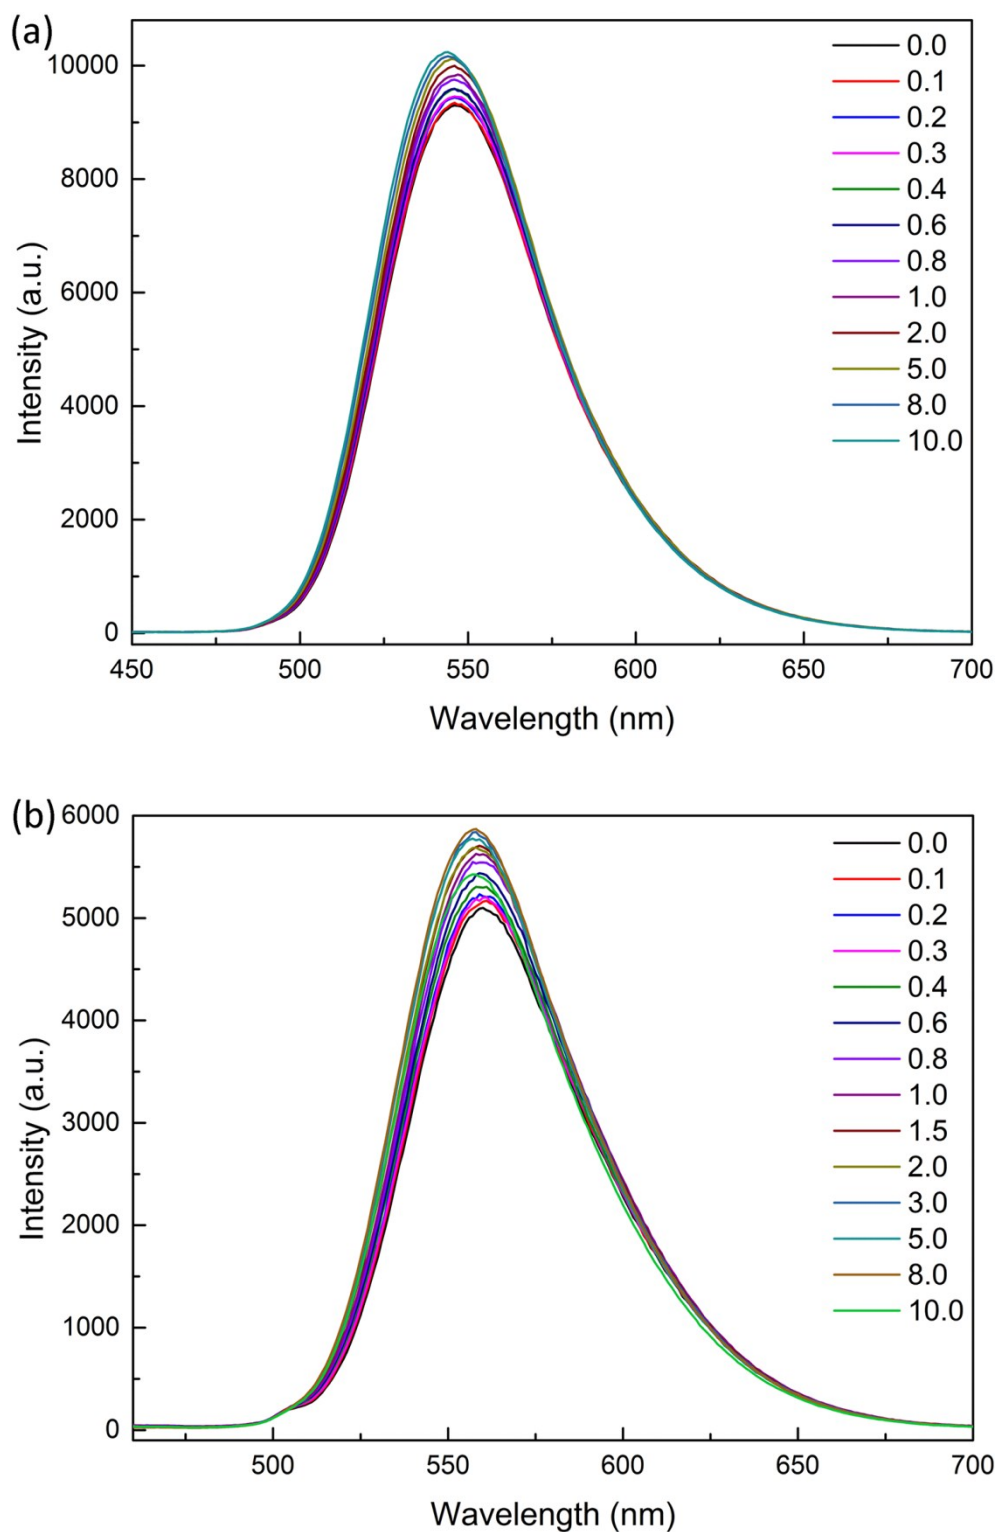

**Fig. S24** Fluorescence spectra ( $\lambda_{\text{exc}} = 445 \text{ nm}$ ) of **1** and **2** upon titration of NaF in THF. (a) **1** ( $2.5 \times 10^{-5} \text{ mol L}^{-1}$ ), NaF (0-10 eq); (b) **2** ( $2.5 \times 10^{-5} \text{ mol L}^{-1}$ ), NaF (0-10 eq).

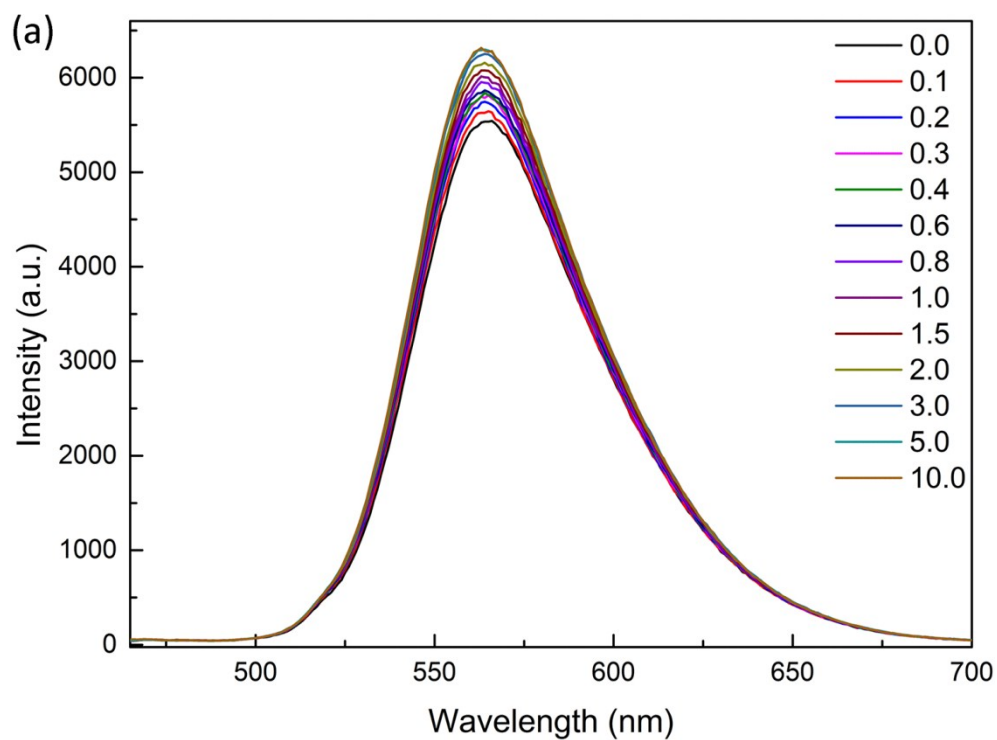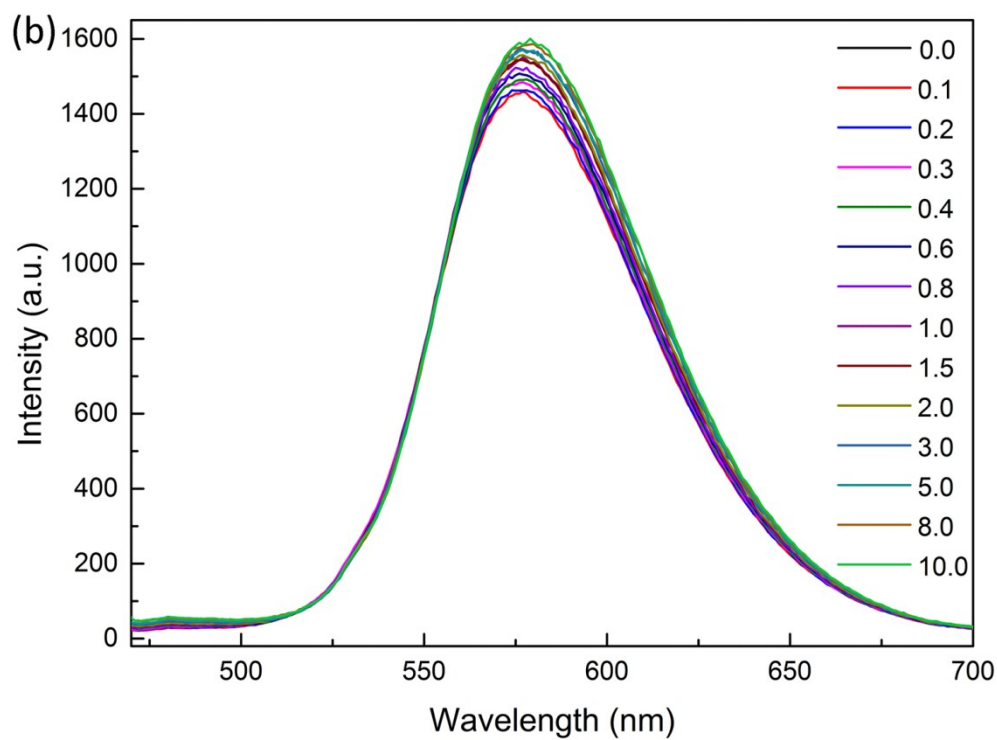

**Fig. S25** Fluorescence spectra ( $\lambda_{\text{exc}} = 445 \text{ nm}$ ) of **3** and **4** upon titration of NaF in THF. (a) **3** ( $2.5 \times 10^{-5} \text{ mol L}^{-1}$ ), NaF (0-10 eq); (b) **4** ( $2.5 \times 10^{-5} \text{ mol L}^{-1}$ ), NaF (0-10 eq).

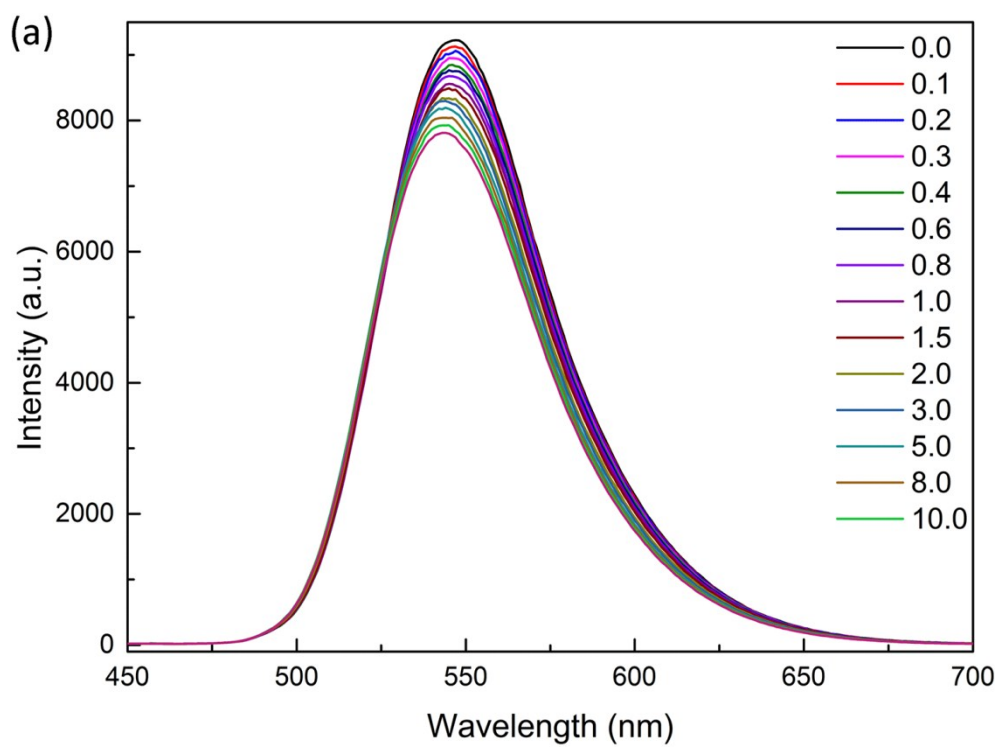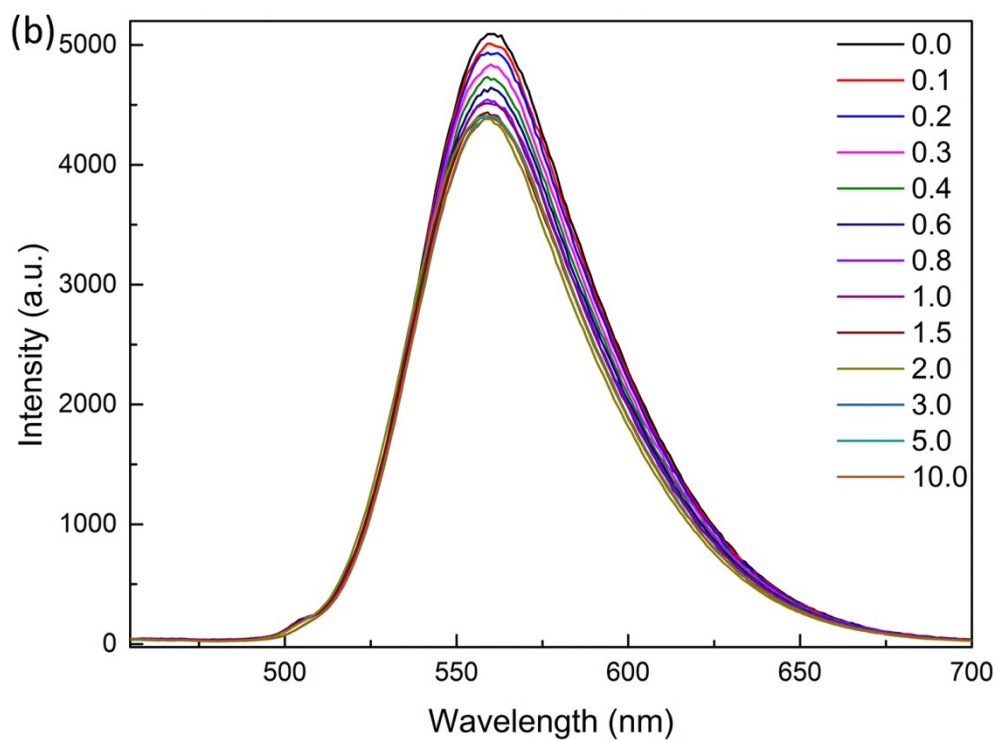

**Fig. S26** Fluorescence spectra ( $\lambda_{\text{exc}} = 445 \text{ nm}$ ) of **1** and **2** upon titration of NaCl in THF. (a) **1** ( $2.5 \times 10^{-5} \text{ mol L}^{-1}$ ), NaCl (0-10 eq); (b) **2** ( $2.5 \times 10^{-5} \text{ mol L}^{-1}$ ), NaCl (0-10 eq).

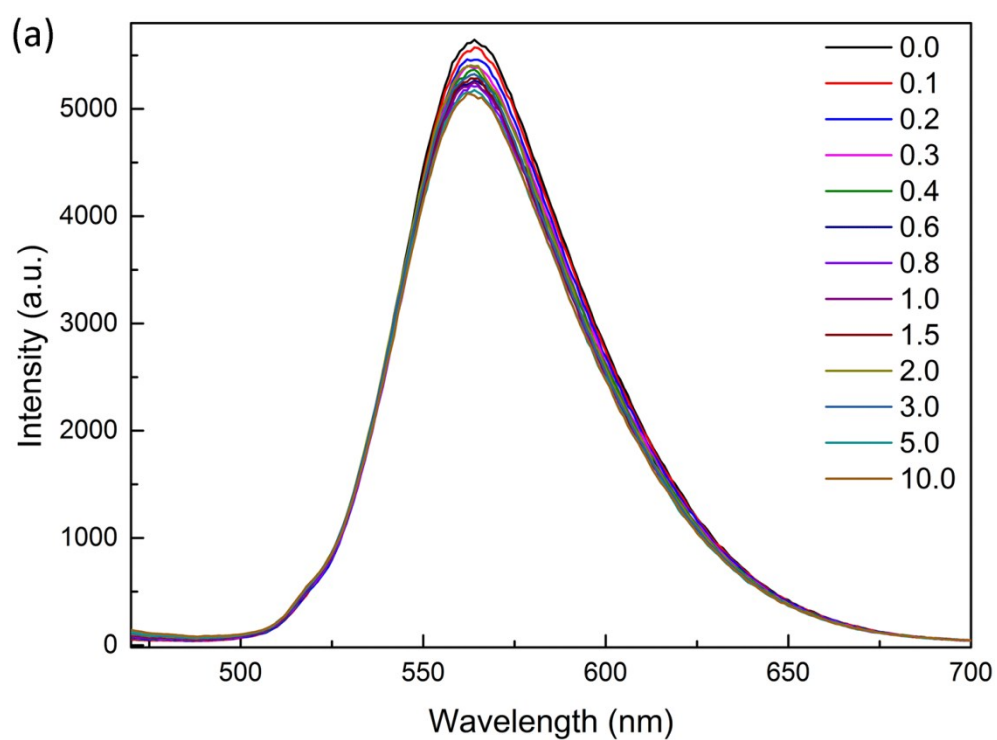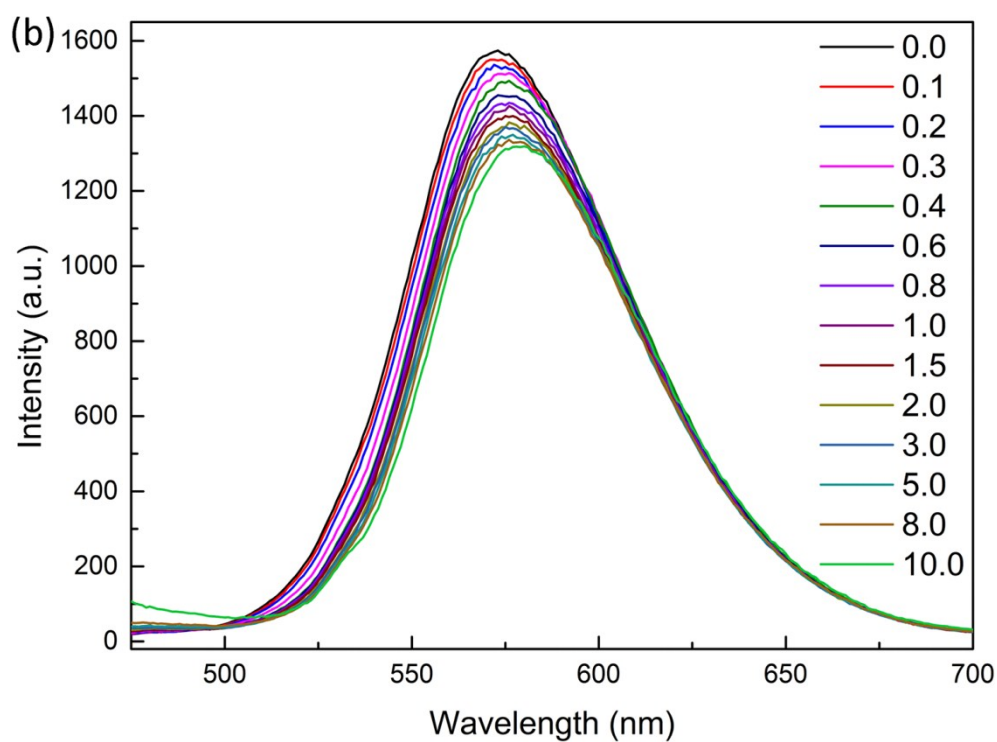

**Fig. S27** Fluorescence spectra ( $\lambda_{\text{exc}} = 445 \text{ nm}$ ) of **3** and **4** upon titration of NaCl in THF. (a) **3** ( $2.5 \times 10^{-5} \text{ mol L}^{-1}$ ), NaCl (0-10 eq); (b) **4** ( $2.5 \times 10^{-5} \text{ mol L}^{-1}$ ), NaCl (0-10 eq).

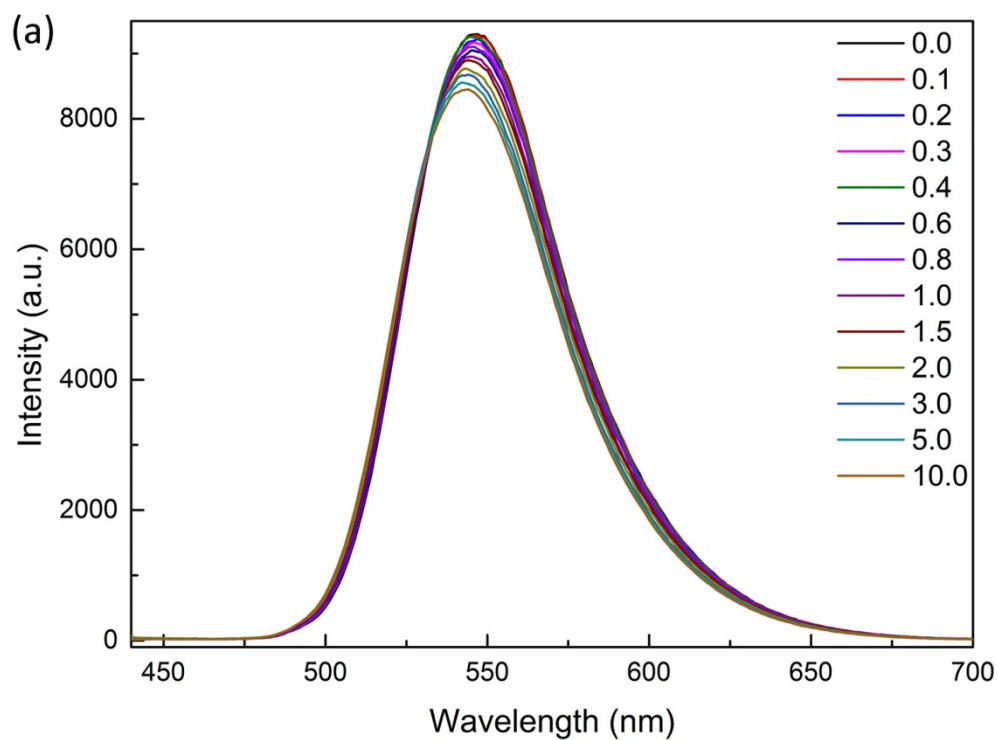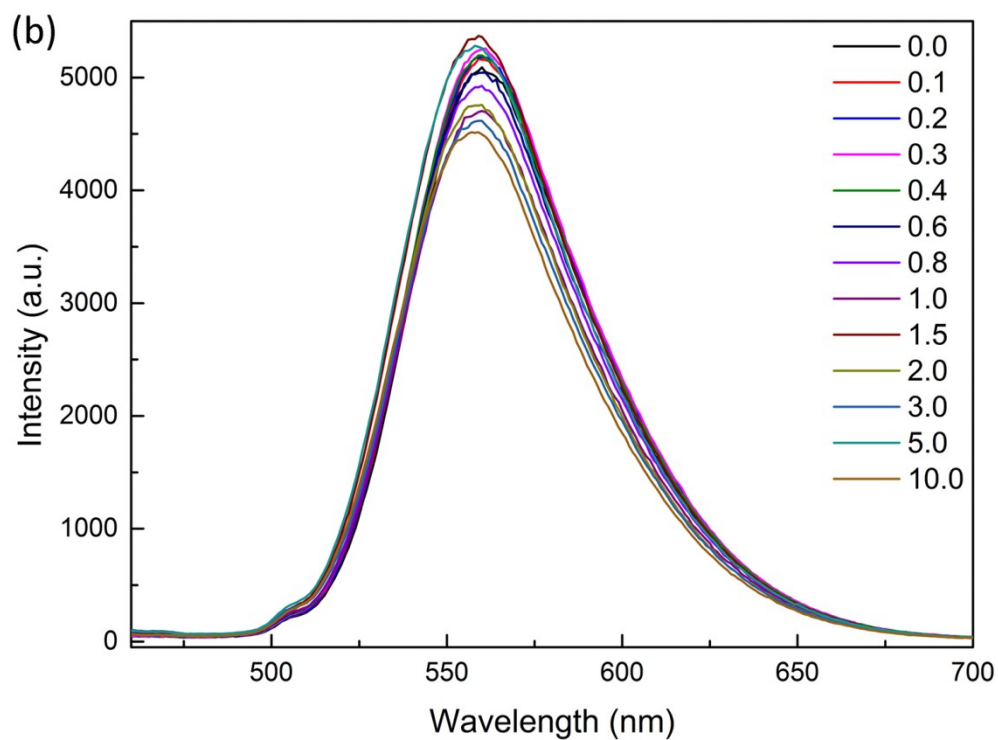

**Fig. S28** Fluorescence spectra ( $\lambda_{\text{exc}} = 445 \text{ nm}$ ) of **1** and **2** upon titration of NaBr in THF. (a) **1** ( $2.5 \times 10^{-5} \text{ mol L}^{-1}$ ), NaBr (0-10 eq); (b) **2** ( $2.5 \times 10^{-5} \text{ mol L}^{-1}$ ), NaBr (0-10 eq).

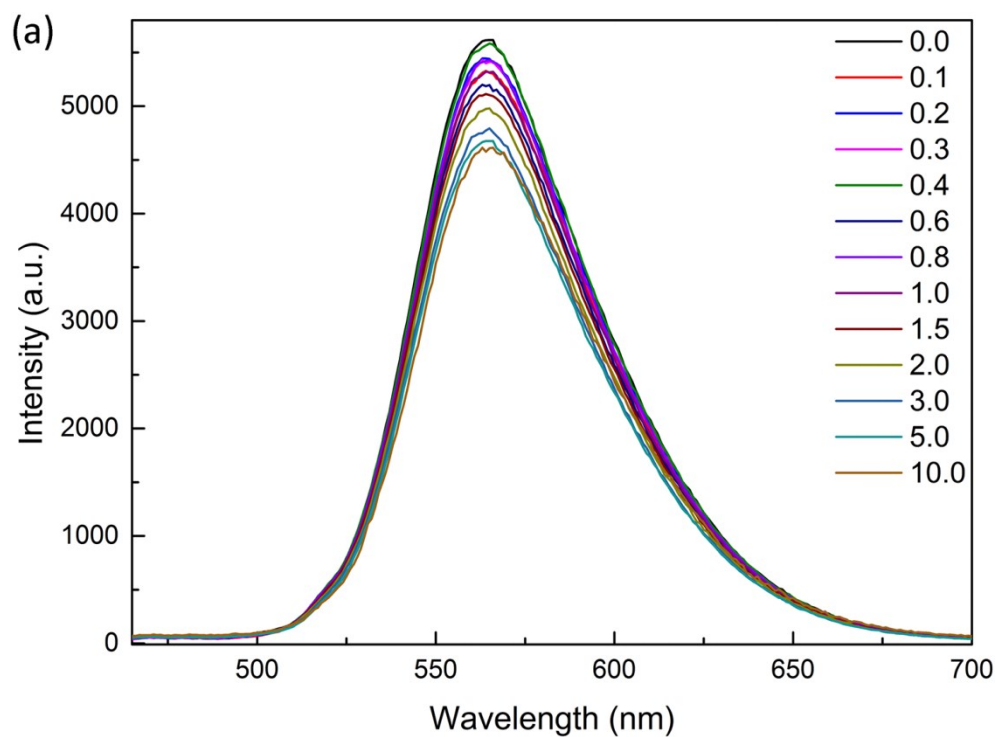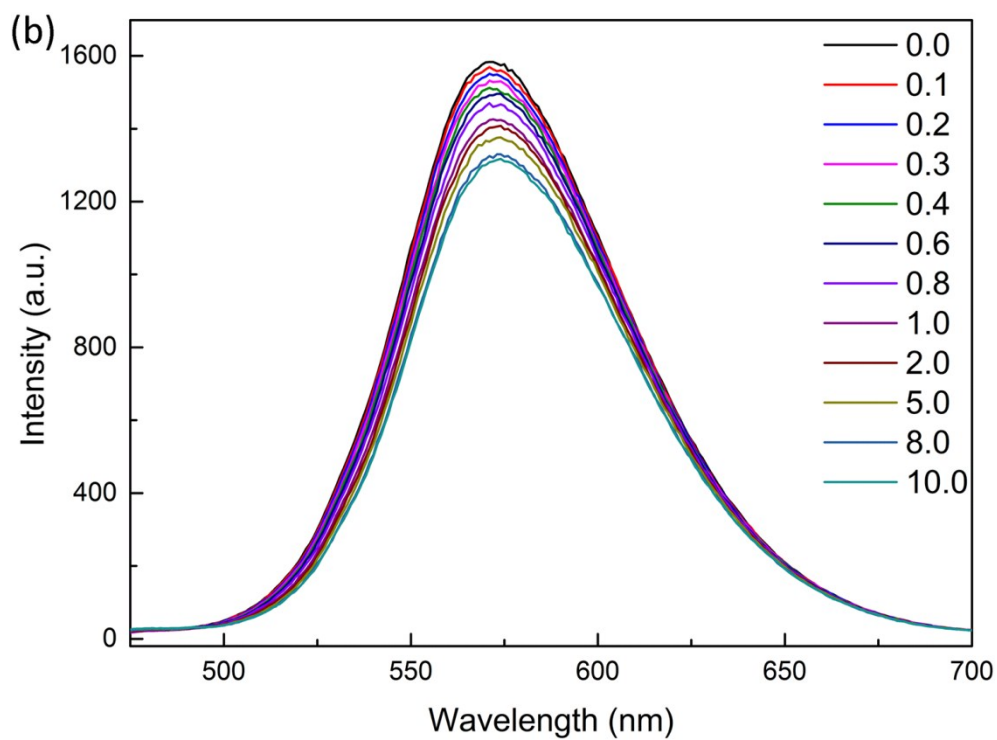

**Fig. S29** Fluorescence spectra ( $\lambda_{\text{exc}} = 445 \text{ nm}$ ) of **3** and **4** upon titration of NaBr in THF. (a) **3** ( $2.5 \times 10^{-5} \text{ mol L}^{-1}$ ), NaBr (0-10 eq); (b) **4** ( $2.5 \times 10^{-5} \text{ mol L}^{-1}$ ), NaBr (0-10 eq).

## 12. Iodide recognition of complexes **1**, **2**, **3** and **4** in THF

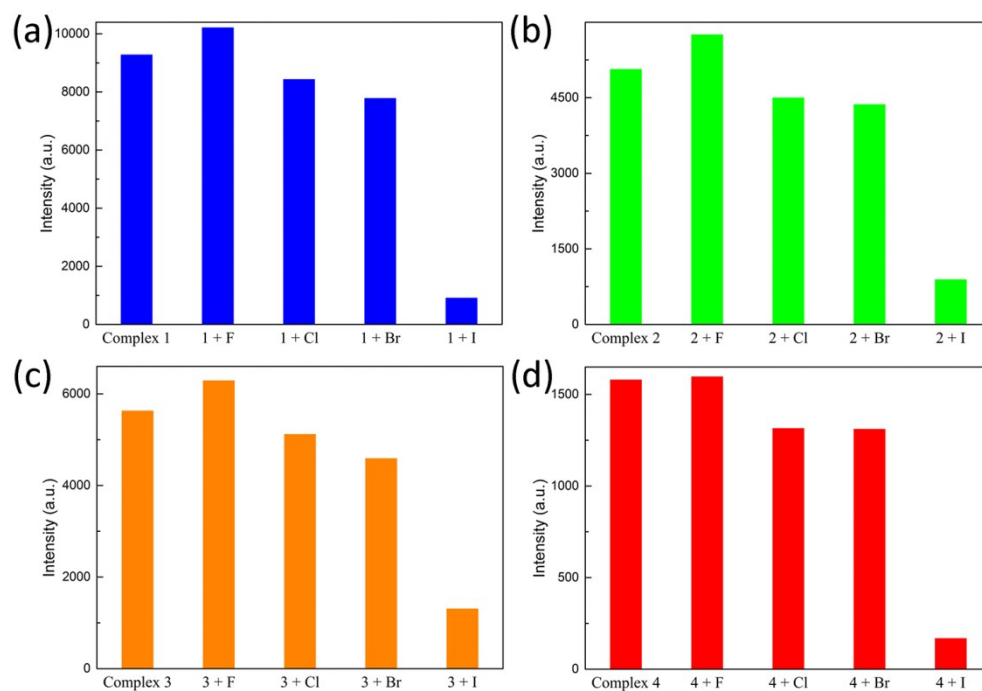

**Fig. S30** (a) Bar graph of Change of fluorescent emission intensities ( $\lambda_{\text{ex}}=445$  nm) at (a) 542 nm of **1** ( $2.5 \times 10^{-5}$  mol L<sup>-1</sup>), (b) 556 nm of **2** ( $2.5 \times 10^{-5}$  mol L<sup>-1</sup>), (c) 563 nm of **3** ( $2.5 \times 10^{-5}$  mol L<sup>-1</sup>), (d) 582 nm of **4** ( $2.5 \times 10^{-5}$  mol L<sup>-1</sup>) on addition of 10 equiv. of F<sup>-</sup>, Cl<sup>-</sup>, Br<sup>-</sup> and I<sup>-</sup> respectively in THF.

13. Benesi-Hilderbrand and Job's plot curve of complexes 1, 2, 3 and 4 with I<sup>-</sup> monitored with UV-Vis spectra

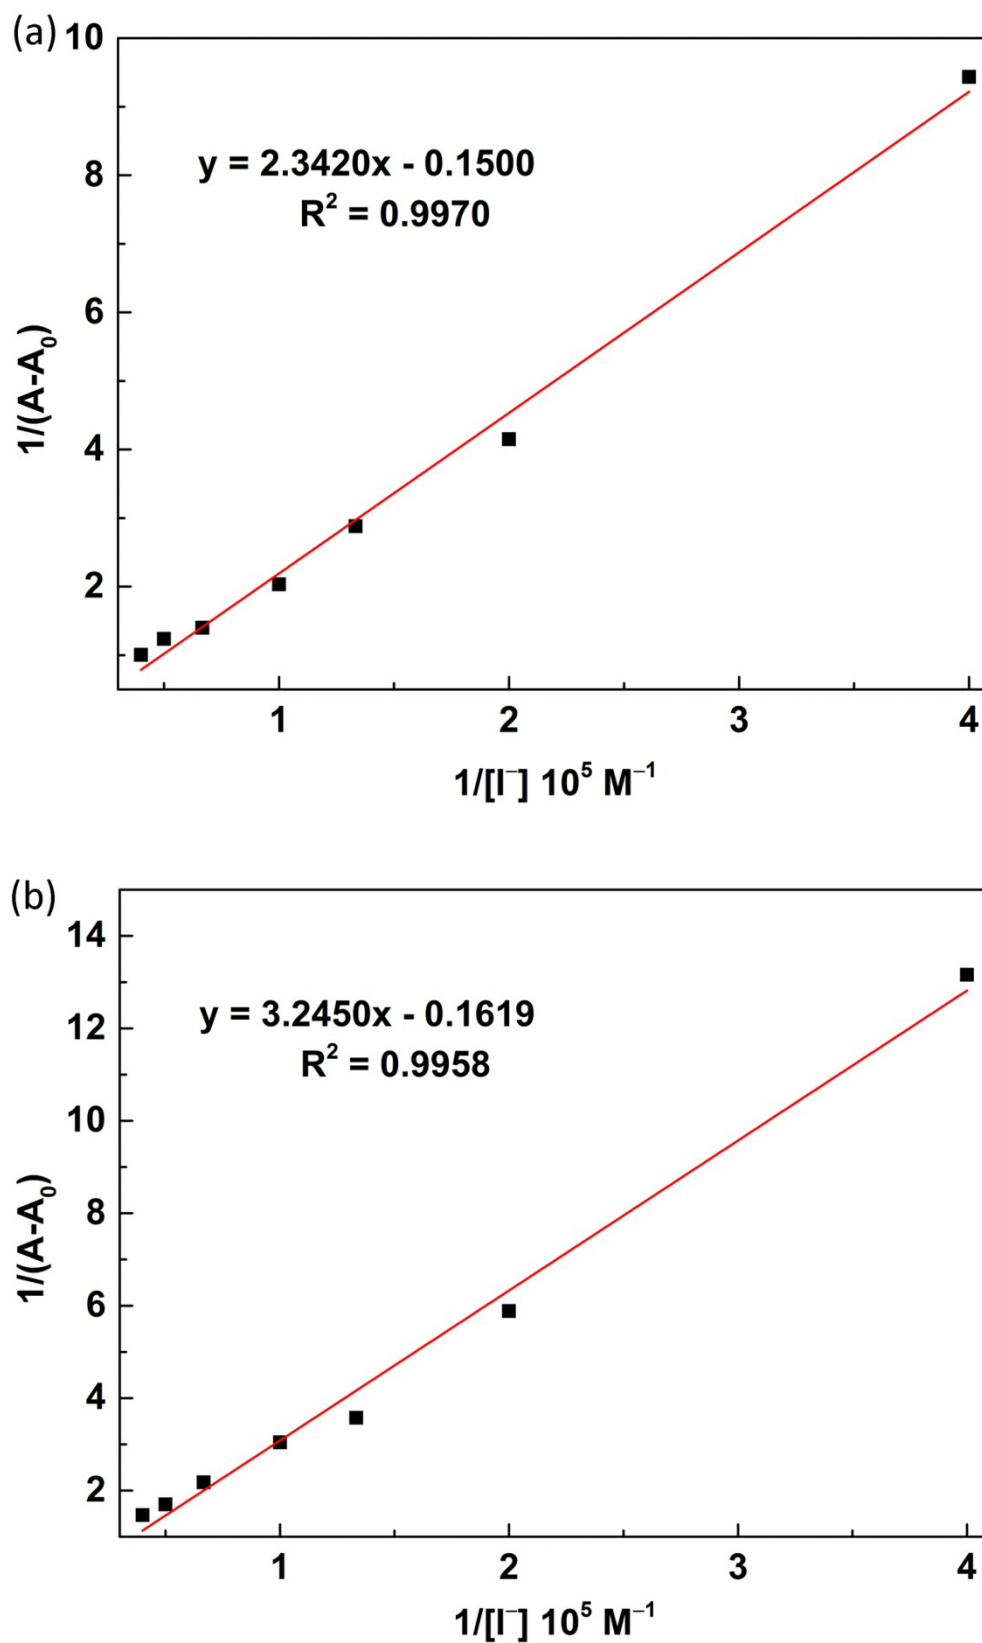

Fig. S31 The Benesi-Hilderbrand curve of complexes 1 (a) and 2 (b) for I<sup>-</sup>.



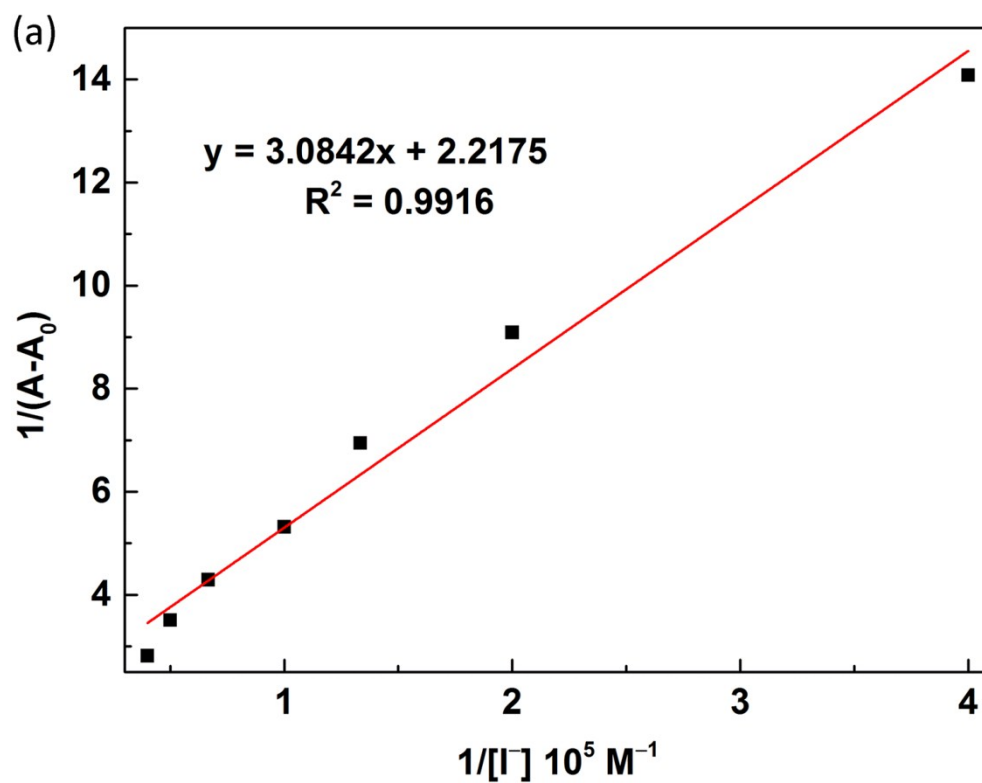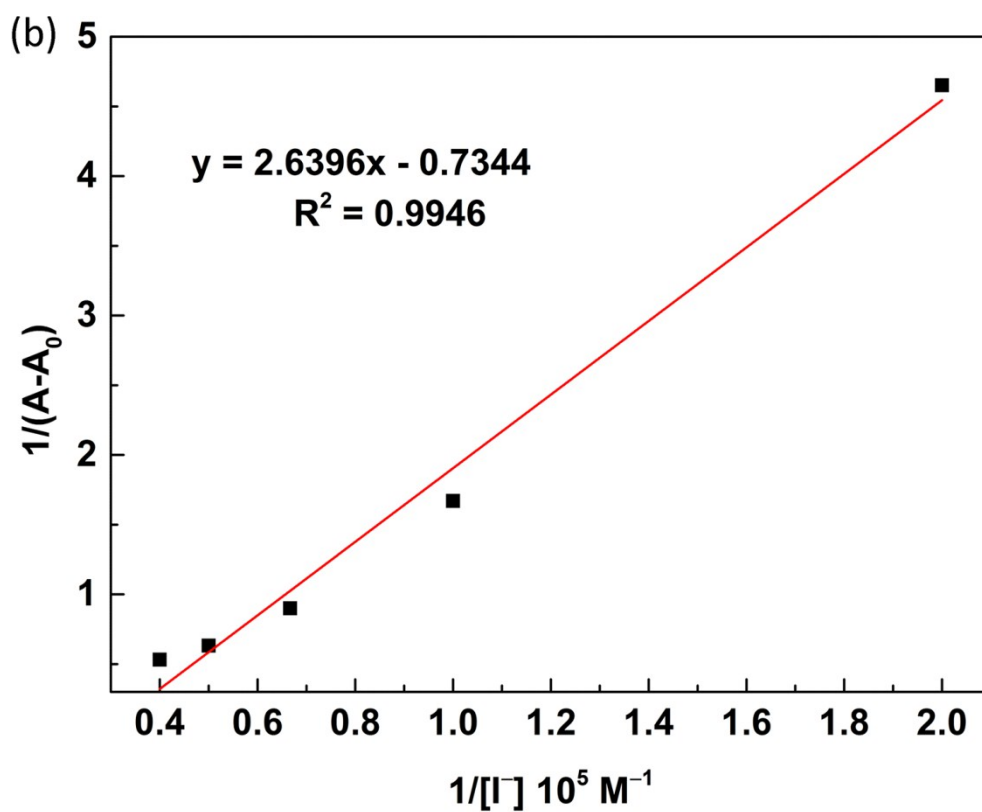

Fig. S32 The Benesi-Hildebrand curve of complexes **1** (a) and **2** (b) for I.

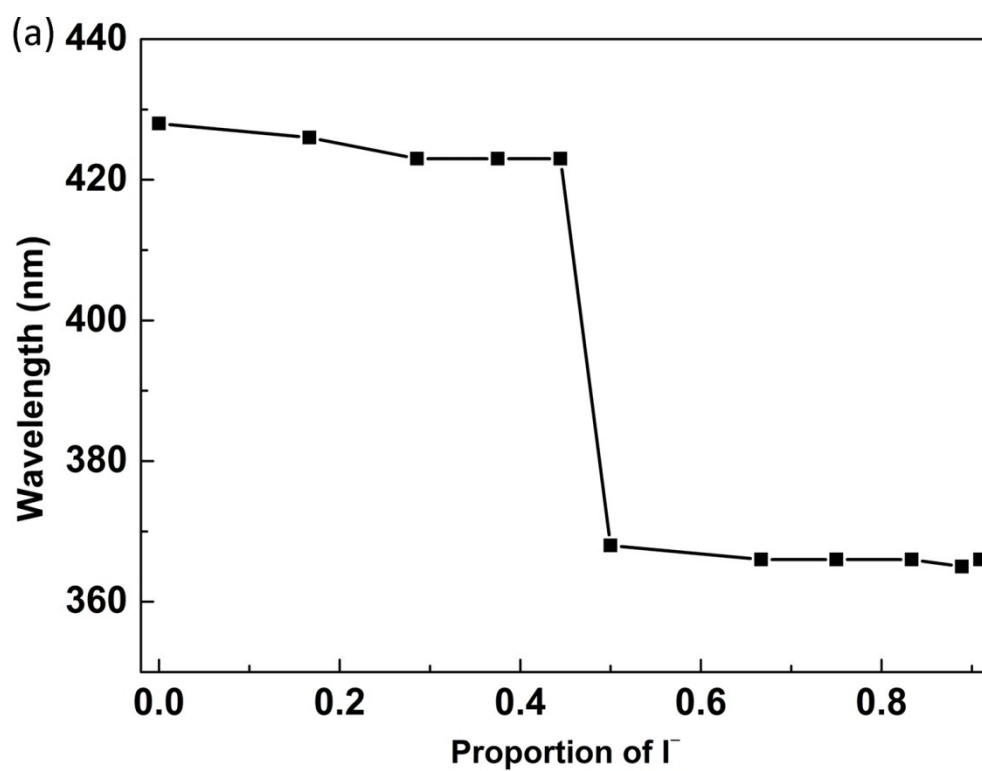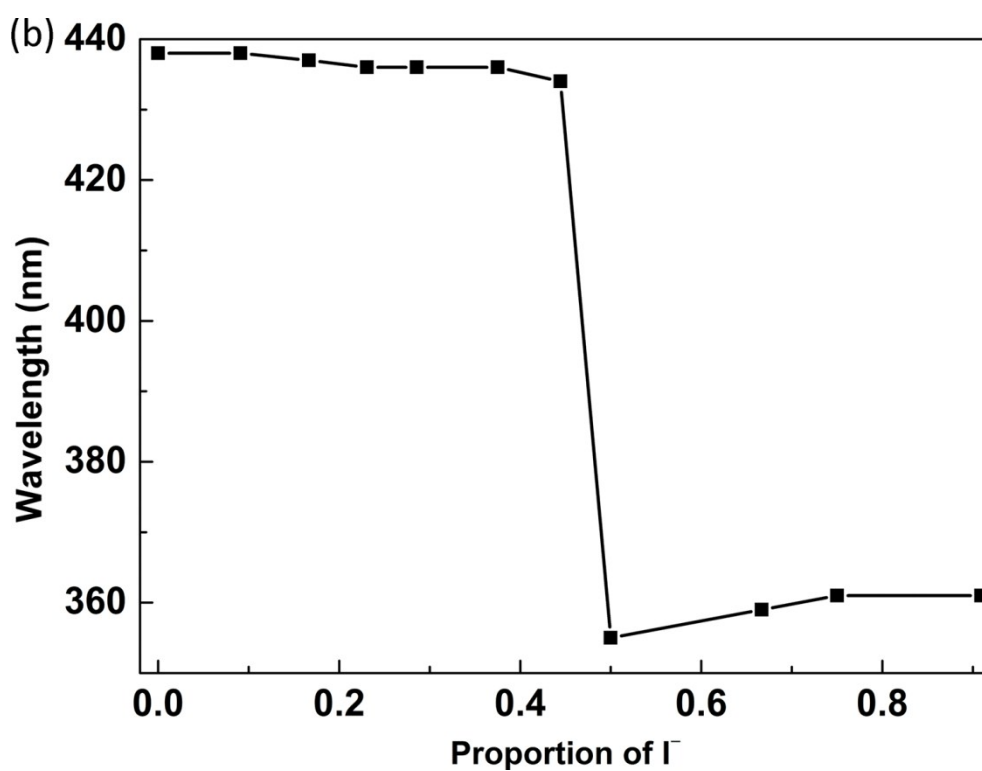

Fig. S33 Job's plot of the complex formation of **1** (a) and **2** (b) with I<sup>-</sup> monitored with UV/vis spectra.

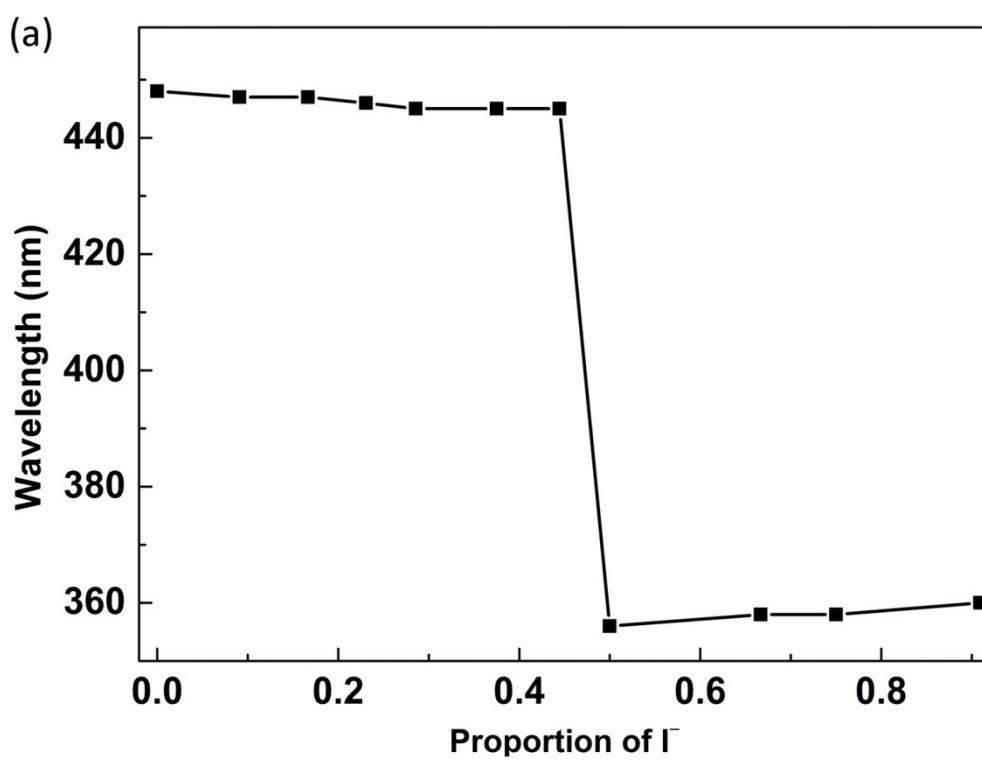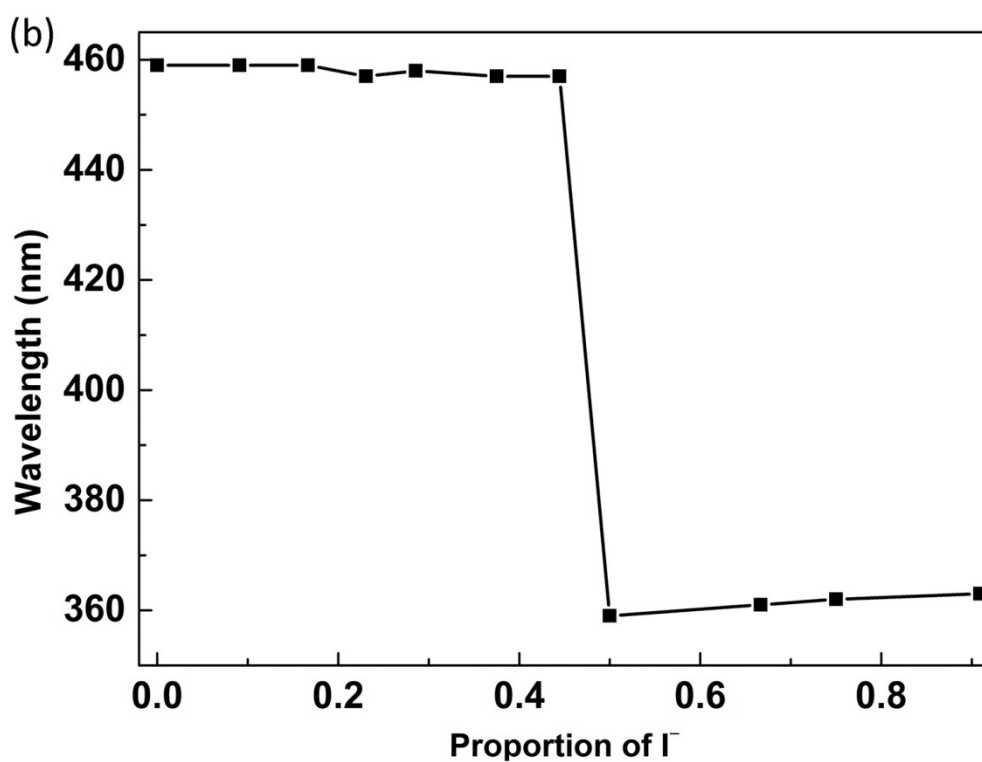

Fig. S34 Job's plot of the complex formation of **3** (a) and **4** (b) with  $I^-$  monitored with UV/vis spectra.

## References:

[1] M. J. Frisch, G. W. Trucks, H. B. Schlegel, G. E. Scuseria, M. A. Robb, J. R. Cheeseman, G. Scalmani, V. Barone, B. Mennucci, G. A. Petersson, H. Nakatsuji, M. Caricato, X. Li, H. P. Hratchian, A. F. Izmaylov, J. Bloino, G. Zheng, J. L. Sonnenberg, M. Hada, M. Ehara, K. Toyota, R. Fukuda, J. Hasegawa, M. Ishida, T. Nakajima, Y. Honda, O. Kitao, H. Nakai, T. Vreven, J. A. Montgomery, Jr., J. E. Peralta, F. Ogliaro, M. Bearpark, J. J. Heyd, E. Brothers, K. N. Kudin, V. N. Staroverov, R. Kobayashi, J. Normand, K. Raghavachari, A. Rendell, J. C. Burant, S. S. Iyengar, J. Tomasi, M. Cossi, N. Rega, J. M. Millam, M. Klene, J. E. Knox, J. B. Cross, V. Bakken, C. Adamo, J. Jaramillo, R. Gomperts, R. E. Stratmann, O. Yazyev, A. J. Austin, R. Cammi, C. Pomelli, J. W. Ochterski, R. L. Martin, K. Morokuma, V. G. Zakrzewski, G. A. Voth, P. Salvador, J. J. Dannenberg, S. Dapprich, A. D. Daniels, O. Farkas, J. B. Foresman, J. V. Ortiz, J. Cioslowski, and D. J. Fox, Gaussian, Inc., Wallingford CT, 2009.
